# Supplementary material for: Synthesis of nano-TiO 2 assisted by glycols and submitted to hydrothermal or conventional heat treatment with promising photocatalytic activity
Source: PeerJ journal article supplement (doi:10.7717/peerj-matsci.13), 2021-03-24
Supplement: Raw_data_Figure_6.zip [file Raw_data_Figure_6.zip]

## Sheet: Inset Absorbance 
190	1146	1085	0.993	0.815	0.631	0.459	0.36	0.278
190.5	1152	1086	1	0.817	0.633	0.46	0.36	0.278
191	1168	1089	1007	0.824	0.637	0.463	0.361	0.277
191.5	1184	1092	1011	0.831	0.642	0.466	0.363	0.277
192	1198	1096	1017	0.837	0.647	0.47	0.365	0.278
192.5	1215	1102	1026	0.845	0.654	0.475	0.368	0.28
193	1235	1108	1036	0.853	0.661	0.481	0.372	0.283
193.5	1255	1115	1046	0.863	0.669	0.487	0.376	0.286
194	1272	1122	1055	0.872	0.677	0.494	0.381	0.289
194.5	1292	1.13	1065	0.882	0.686	0.501	0.386	0.293
195	1312	1141	1076	0.893	0.695	0.508	0.392	0.297
195.5	1334	1152	1089	0.904	0.705	0.516	0.398	0.301
196	1355	1164	1103	0.915	0.716	0.524	0.404	0.306
196.5	1373	1177	1115	0.926	0.725	0.532	0.409	0.31
197	1394	1191	1128	0.937	0.734	0.539	0.415	0.314
197.5	1417	1206	1143	0.948	0.744	0.547	0.421	0.318
198	1436	1223	1158	0.961	0.754	0.554	0.426	0.323
198.5	1458	1243	1174	0.974	0.764	0.561	0.431	0.326
199	1481	1262	1189	0.984	0.773	0.568	0.436	0.33
199.5	1503	1282	1204	0.995	0.781	0.574	0.441	0.333
200	1523	1304	1219	1007	0.789	0.579	0.445	0.335
200.5	1543	1325	1233	1017	0.796	0.584	0.448	0.338
201	1564	1346	1249	1026	0.802	0.589	0.451	0.34
201.5	1586	1369	1264	1034	0.807	0.592	0.452	0.341
202	1609	1393	1277	1042	0.811	0.594	0.454	0.342
202.5	1634	1416	1292	1048	0.814	0.595	0.454	0.342
203	1658	1439	1305	1053	0.816	0.595	0.454	0.341
203.5	1682	1463	1317	1057	0.816	0.594	0.452	0.34
204	1707	1486	1328	1059	0.815	0.592	0.45	0.338
204.5	1737	1509	1.34	1061	0.812	0.589	0.447	0.336
205	1768	1533	1.35	1061	0.809	0.585	0.444	0.333
205.5	1.8	1556	1359	1.06	0.804	0.581	0.44	0.33
206	1831	1579	1368	1057	0.799	0.576	0.436	0.327
206.5	1.86	1.6	1373	1053	0.792	0.571	0.432	0.324
207	1.89	1.62	1379	1048	0.785	0.565	0.427	0.32
207.5	1922	1641	1384	1043	0.777	0.558	0.421	0.316
208	1957	1662	1388	1035	0.767	0.55	0.415	0.312
208.5	1995	1683	1391	1026	0.756	0.542	0.408	0.307
209	2033	1704	1393	1016	0.744	0.532	0.401	0.301
209.5	2072	1724	1394	1005	0.731	0.523	0.393	0.296
210	2108	1741	1394	0.993	0.718	0.512	0.385	0.29
210.5	2139	1759	1393	0.981	0.704	0.502	0.377	0.284
211	2173	1777	1391	0.968	0.69	0.491	0.37	0.278
211.5	2.21	1795	1389	0.955	0.676	0.48	0.361	0.272
212	2251	1.81	1385	0.94	0.66	0.468	0.352	0.265
212.5	2286	1818	1379	0.925	0.645	0.457	0.343	0.258
213	2312	1823	1371	0.909	0.63	0.445	0.334	0.251
213.5	2.34	1828	1363	0.894	0.614	0.433	0.325	0.244
214	2.37	1.83	1354	0.878	0.599	0.421	0.316	0.237
214.5	2389	1828	1343	0.863	0.585	0.41	0.307	0.23
215	2402	1825	1331	0.847	0.571	0.398	0.299	0.224
215.5	2408	1817	1317	0.831	0.557	0.387	0.29	0.218
216	2415	1805	1302	0.816	0.544	0.377	0.283	0.212
216.5	2415	1793	1289	0.801	0.531	0.368	0.275	0.206
217	2402	1777	1274	0.787	0.52	0.359	0.268	0.201
217.5	2382	1759	1257	0.773	0.508	0.35	0.262	0.196
218	2358	1739	1239	0.759	0.497	0.342	0.256	0.192
218.5	2323	1718	1221	0.746	0.487	0.335	0.25	0.188
219	2286	1694	1203	0.734	0.478	0.328	0.245	0.184
219.5	2242	1669	1183	0.721	0.469	0.322	0.24	0.181
220	2193	1643	1164	0.709	0.461	0.316	0.236	0.178
220.5	2143	1613	1144	0.698	0.454	0.311	0.233	0.175
221	2085	1584	1124	0.688	0.447	0.307	0.229	0.172
221.5	2031	1552	1104	0.678	0.441	0.303	0.226	0.17
222	1975	1.52	1083	0.668	0.435	0.299	0.224	0.168
222.5	1914	1487	1063	0.659	0.43	0.295	0.221	0.166
223	1853	1452	1043	0.651	0.424	0.292	0.218	0.164
223.5	1794	1415	1022	0.642	0.419	0.289	0.216	0.162
224	1739	1378	1001	0.634	0.415	0.285	0.213	0.16
224.5	1685	1341	0.982	0.626	0.411	0.282	0.211	0.158
225	1636	1307	0.964	0.618	0.406	0.28	0.209	0.156
225.5	1593	1276	0.947	0.612	0.402	0.277	0.207	0.155
226	1552	1246	0.93	0.605	0.399	0.274	0.204	0.153
226.5	1514	1218	0.916	0.598	0.395	0.271	0.202	0.151
227	1.48	1193	0.901	0.592	0.391	0.269	0.2	0.15
227.5	1448	1.17	0.888	0.587	0.387	0.266	0.198	0.148
228	1419	1.15	0.876	0.581	0.384	0.263	0.196	0.146
228.5	1393	1131	0.865	0.576	0.38	0.26	0.193	0.144
229	1369	1116	0.855	0.571	0.377	0.258	0.191	0.143
229.5	1346	1102	0.846	0.566	0.374	0.255	0.189	0.141
230	1324	1089	0.838	0.562	0.37	0.252	0.187	0.139
230.5	1304	1078	0.83	0.557	0.366	0.25	0.184	0.137
231	1285	1068	0.823	0.552	0.363	0.247	0.182	0.135
231.5	1267	1059	0.815	0.547	0.359	0.243	0.179	0.133
232	1249	1052	0.808	0.542	0.354	0.24	0.176	0.13
232.5	1232	1044	0.8	0.536	0.35	0.236	0.173	0.128
233	1217	1037	0.793	0.53	0.345	0.233	0.17	0.126
233.5	1202	1031	0.786	0.524	0.34	0.229	0.167	0.123
234	1189	1025	0.78	0.518	0.335	0.225	0.164	0.121
234.5	1178	1.02	0.773	0.512	0.33	0.221	0.161	0.118
235	1168	1016	0.766	0.506	0.325	0.217	0.158	0.116
235.5	1.16	1011	0.761	0.5	0.321	0.214	0.155	0.114
236	1154	1008	0.756	0.495	0.317	0.21	0.153	0.112
236.5	1149	1006	0.751	0.49	0.313	0.207	0.15	0.11
237	1146	1004	0.747	0.485	0.309	0.204	0.148	0.108
237.5	1144	1001	0.743	0.481	0.305	0.202	0.146	0.106
238	1143	0.999	0.739	0.476	0.302	0.199	0.143	0.105
238.5	1144	0.996	0.735	0.472	0.298	0.196	0.141	0.103
239	1145	0.994	0.731	0.468	0.295	0.193	0.139	0.101
239.5	1146	0.991	0.727	0.463	0.291	0.19	0.136	0.099
240	1147	0.987	0.723	0.459	0.288	0.187	0.134	0.097
240.5	1149	0.983	0.719	0.455	0.285	0.185	0.132	0.095
241	1151	0.979	0.715	0.452	0.282	0.182	0.13	0.093
241.5	1153	0.974	0.71	0.448	0.279	0.18	0.127	0.091
242	1155	0.969	0.706	0.444	0.276	0.177	0.125	0.09
242.5	1157	0.963	0.701	0.44	0.273	0.175	0.123	0.088
243	1.16	0.956	0.696	0.436	0.27	0.173	0.121	0.086
243.5	1162	0.948	0.69	0.431	0.266	0.17	0.119	0.085
244	1164	0.94	0.684	0.426	0.263	0.167	0.117	0.083
244.5	1166	0.93	0.678	0.422	0.26	0.165	0.115	0.081
245	1168	0.919	0.671	0.417	0.256	0.162	0.113	0.08
245.5	1168	0.909	0.664	0.412	0.253	0.16	0.111	0.078
246	1168	0.898	0.657	0.408	0.25	0.157	0.109	0.076
246.5	1166	0.886	0.651	0.404	0.247	0.155	0.107	0.075
247	1164	0.873	0.643	0.399	0.244	0.153	0.105	0.073
247.5	1161	0.859	0.635	0.395	0.241	0.151	0.103	0.072
248	1157	0.845	0.628	0.391	0.239	0.148	0.101	0.07
248.5	1151	0.83	0.619	0.386	0.236	0.146	0.099	0.069
249	1144	0.814	0.611	0.382	0.233	0.144	0.098	0.067
249.5	1135	0.798	0.602	0.377	0.23	0.142	0.096	0.066
250	1125	0.781	0.593	0.373	0.227	0.14	0.094	0.064
250.5	1115	0.765	0.584	0.368	0.225	0.138	0.093	0.063
251	1104	0.749	0.575	0.364	0.222	0.136	0.091	0.062
251.5	1.09	0.731	0.565	0.359	0.219	0.134	0.089	0.06
252	1076	0.713	0.555	0.354	0.216	0.132	0.088	0.059
252.5	1.06	0.695	0.545	0.349	0.213	0.13	0.086	0.058
253	1042	0.677	0.534	0.344	0.21	0.127	0.084	0.057
253.5	1023	0.658	0.524	0.339	0.207	0.125	0.083	0.055
254	1003	0.64	0.513	0.334	0.204	0.123	0.081	0.054
254.5	0.982	0.622	0.502	0.329	0.201	0.121	0.08	0.053
255	0.96	0.605	0.492	0.324	0.198	0.119	0.078	0.052
255.5	0.938	0.587	0.481	0.319	0.195	0.117	0.077	0.051
256	0.915	0.571	0.471	0.314	0.192	0.115	0.076	0.05
256.5	0.892	0.554	0.461	0.309	0.19	0.114	0.074	0.05
257	0.868	0.538	0.451	0.304	0.187	0.112	0.073	0.049
257.5	0.845	0.521	0.442	0.3	0.184	0.11	0.072	0.048
258	0.822	0.506	0.432	0.295	0.182	0.109	0.071	0.047
258.5	0.8	0.491	0.423	0.291	0.179	0.107	0.07	0.046
259	0.78	0.478	0.415	0.287	0.177	0.106	0.069	0.046
259.5	0.761	0.466	0.407	0.283	0.175	0.105	0.068	0.045
260	0.743	0.455	0.4	0.279	0.173	0.103	0.067	0.045
260.5	0.726	0.445	0.393	0.276	0.171	0.102	0.066	0.044
261	0.71	0.435	0.387	0.272	0.169	0.1	0.065	0.043
261.5	0.694	0.426	0.38	0.268	0.166	0.099	0.065	0.043
262	0.679	0.418	0.374	0.265	0.164	0.098	0.064	0.042
262.5	0.664	0.41	0.368	0.261	0.161	0.096	0.063	0.042
263	0.651	0.402	0.362	0.257	0.159	0.095	0.062	0.041
263.5	0.638	0.395	0.357	0.254	0.157	0.093	0.061	0.04
264	0.626	0.389	0.351	0.25	0.154	0.092	0.06	0.04
264.5	0.614	0.382	0.346	0.246	0.152	0.09	0.059	0.039
265	0.604	0.376	0.341	0.243	0.15	0.089	0.058	0.039
265.5	0.593	0.37	0.336	0.239	0.147	0.088	0.057	0.038
266	0.583	0.364	0.331	0.235	0.145	0.086	0.056	0.037
266.5	0.574	0.359	0.327	0.232	0.142	0.085	0.055	0.037
267	0.566	0.354	0.322	0.228	0.14	0.083	0.054	0.036
267.5	0.558	0.349	0.318	0.225	0.138	0.082	0.053	0.036
268	0.551	0.344	0.313	0.221	0.136	0.08	0.052	0.035
268.5	0.544	0.339	0.309	0.218	0.133	0.079	0.052	0.035
269	0.538	0.335	0.305	0.215	0.131	0.078	0.051	0.034
269.5	0.532	0.331	0.302	0.212	0.13	0.077	0.05	0.034
270	0.527	0.327	0.298	0.209	0.128	0.076	0.05	0.033
270.5	0.522	0.323	0.294	0.206	0.126	0.075	0.049	0.033
271	0.518	0.319	0.291	0.203	0.124	0.074	0.048	0.033
271.5	0.514	0.315	0.287	0.2	0.122	0.073	0.048	0.032
272	0.51	0.311	0.283	0.198	0.12	0.072	0.047	0.032
272.5	0.507	0.308	0.28	0.195	0.119	0.071	0.046	0.031
273	0.505	0.305	0.277	0.192	0.117	0.07	0.046	0.031
273.5	0.502	0.302	0.273	0.19	0.115	0.069	0.045	0.031
274	0.5	0.299	0.271	0.188	0.114	0.068	0.045	0.03
274.5	0.498	0.297	0.268	0.185	0.112	0.067	0.044	0.03
275	0.496	0.294	0.265	0.183	0.111	0.066	0.043	0.03
275.5	0.495	0.293	0.263	0.181	0.109	0.065	0.043	0.029
276	0.493	0.291	0.261	0.179	0.108	0.065	0.042	0.029
276.5	0.492	0.289	0.258	0.177	0.107	0.064	0.042	0.028
277	0.491	0.288	0.257	0.175	0.105	0.063	0.041	0.028
277.5	0.489	0.287	0.255	0.174	0.104	0.062	0.041	0.028
278	0.488	0.286	0.254	0.172	0.103	0.062	0.041	0.028
278.5	0.487	0.286	0.252	0.171	0.102	0.061	0.04	0.027
279	0.485	0.286	0.251	0.17	0.102	0.061	0.04	0.027
279.5	0.484	0.285	0.25	0.168	0.101	0.06	0.04	0.027
280	0.482	0.285	0.249	0.167	0.1	0.06	0.04	0.027
280.5	0.48	0.285	0.248	0.167	0.1	0.06	0.039	0.027
281	0.477	0.285	0.247	0.166	0.099	0.059	0.039	0.027
281.5	0.475	0.285	0.246	0.165	0.099	0.059	0.039	0.027
282	0.473	0.286	0.246	0.164	0.098	0.059	0.039	0.027
282.5	0.47	0.286	0.245	0.164	0.098	0.059	0.039	0.027
283	0.468	0.286	0.245	0.163	0.098	0.059	0.039	0.026
283.5	0.465	0.286	0.244	0.162	0.097	0.058	0.038	0.026
284	0.462	0.287	0.244	0.161	0.096	0.058	0.038	0.026
284.5	0.46	0.287	0.243	0.161	0.096	0.057	0.038	0.026
285	0.458	0.287	0.243	0.16	0.095	0.057	0.037	0.026
285.5	0.456	0.288	0.242	0.159	0.094	0.056	0.037	0.025
286	0.453	0.288	0.241	0.158	0.094	0.056	0.036	0.025
286.5	0.452	0.289	0.241	0.157	0.093	0.055	0.036	0.024
287	0.45	0.29	0.24	0.157	0.092	0.054	0.035	0.024
287.5	0.448	0.29	0.24	0.156	0.092	0.054	0.035	0.024
288	0.447	0.291	0.24	0.155	0.091	0.053	0.035	0.023
288.5	0.445	0.292	0.24	0.155	0.091	0.053	0.034	0.023
289	0.443	0.293	0.24	0.154	0.09	0.053	0.034	0.023
289.5	0.442	0.294	0.239	0.154	0.09	0.052	0.034	0.023
290	0.439	0.295	0.239	0.153	0.089	0.052	0.033	0.023
290.5	0.437	0.296	0.239	0.153	0.089	0.052	0.033	0.023
291	0.433	0.297	0.239	0.152	0.089	0.052	0.033	0.022
291.5	0.43	0.297	0.239	0.152	0.088	0.052	0.033	0.022
292	0.425	0.298	0.238	0.152	0.088	0.051	0.033	0.022
292.5	0.42	0.298	0.238	0.151	0.088	0.051	0.033	0.022
293	0.414	0.298	0.237	0.15	0.087	0.051	0.032	0.022
293.5	0.409	0.298	0.236	0.149	0.086	0.05	0.032	0.022
294	0.403	0.297	0.235	0.148	0.085	0.05	0.032	0.021
294.5	0.396	0.297	0.234	0.147	0.085	0.049	0.031	0.021
295	0.39	0.296	0.232	0.146	0.084	0.048	0.031	0.02
295.5	0.383	0.295	0.231	0.144	0.083	0.047	0.03	0.02
296	0.377	0.295	0.229	0.143	0.081	0.046	0.029	0.019
296.5	0.371	0.294	0.227	0.141	0.08	0.045	0.028	0.019
297	0.365	0.293	0.226	0.14	0.079	0.044	0.028	0.018
297.5	0.36	0.293	0.224	0.138	0.078	0.043	0.027	0.018
298	0.356	0.293	0.223	0.137	0.077	0.043	0.026	0.017
298.5	0.353	0.293	0.222	0.136	0.076	0.042	0.026	0.017
299	0.35	0.293	0.221	0.134	0.075	0.041	0.025	0.016
299.5	0.348	0.293	0.22	0.133	0.074	0.04	0.025	0.016
300	0.347	0.293	0.219	0.132	0.073	0.04	0.024	0.016
300.5	0.346	0.294	0.219	0.131	0.072	0.039	0.024	0.015
301	0.345	0.294	0.218	0.13	0.071	0.039	0.023	0.015
301.5	0.345	0.295	0.217	0.129	0.071	0.038	0.023	0.015
302	0.346	0.296	0.217	0.128	0.07	0.038	0.023	0.015
302.5	0.347	0.297	0.216	0.127	0.069	0.037	0.022	0.015
303	0.348	0.298	0.216	0.126	0.068	0.037	0.022	0.014
303.5	0.349	0.298	0.216	0.125	0.068	0.037	0.022	0.014
304	0.35	0.299	0.215	0.125	0.067	0.036	0.022	0.014
304.5	0.351	0.3	0.215	0.124	0.066	0.036	0.021	0.014
305	0.351	0.3	0.214	0.123	0.066	0.035	0.021	0.013
305.5	0.352	0.301	0.214	0.122	0.065	0.035	0.021	0.013
306	0.353	0.301	0.213	0.121	0.064	0.034	0.021	0.013
306.5	0.353	0.301	0.212	0.12	0.063	0.034	0.02	0.013
307	0.353	0.301	0.211	0.119	0.063	0.034	0.02	0.013
307.5	0.353	0.301	0.211	0.118	0.062	0.033	0.02	0.013
308	0.353	0.301	0.21	0.117	0.062	0.033	0.02	0.012
308.5	0.353	0.301	0.209	0.116	0.061	0.032	0.019	0.012
309	0.353	0.301	0.209	0.115	0.06	0.032	0.019	0.012
309.5	0.354	0.301	0.208	0.114	0.06	0.031	0.019	0.012
310	0.354	0.301	0.207	0.113	0.059	0.031	0.018	0.012
310.5	0.355	0.301	0.207	0.113	0.058	0.031	0.018	0.012
311	0.356	0.301	0.206	0.112	0.058	0.03	0.018	0.011
311.5	0.358	0.301	0.205	0.111	0.057	0.03	0.018	0.011
312	0.359	0.301	0.205	0.11	0.056	0.03	0.018	0.011
312.5	0.362	0.301	0.204	0.109	0.056	0.029	0.017	0.011
313	0.364	0.301	0.204	0.108	0.055	0.029	0.017	0.011
313.5	0.367	0.302	0.203	0.107	0.054	0.028	0.017	0.011
314	0.371	0.302	0.203	0.107	0.054	0.028	0.016	0.01
314.5	0.375	0.302	0.203	0.106	0.053	0.028	0.016	0.01
315	0.379	0.303	0.202	0.105	0.053	0.027	0.016	0.01
315.5	0.383	0.303	0.202	0.104	0.052	0.027	0.016	0.01
316	0.387	0.304	0.202	0.104	0.051	0.027	0.016	0.01
316.5	0.392	0.304	0.202	0.103	0.051	0.026	0.015	0.01
317	0.397	0.305	0.202	0.103	0.05	0.026	0.015	0.01
317.5	0.402	0.306	0.202	0.102	0.05	0.025	0.015	0.009
318	0.406	0.306	0.201	0.101	0.049	0.025	0.015	0.009
318.5	0.411	0.307	0.201	0.101	0.049	0.025	0.014	0.009
319	0.416	0.307	0.201	0.1	0.048	0.025	0.014	0.009
319.5	0.421	0.307	0.201	0.1	0.048	0.024	0.014	0.009
320	0.425	0.308	0.201	0.099	0.047	0.024	0.014	0.009
320.5	0.43	0.308	0.201	0.099	0.047	0.024	0.014	0.008
321	0.434	0.308	0.201	0.098	0.046	0.023	0.013	0.008
321.5	0.438	0.309	0.201	0.098	0.046	0.023	0.013	0.008
322	0.442	0.309	0.201	0.097	0.045	0.023	0.013	0.008
322.5	0.446	0.309	0.2	0.096	0.045	0.023	0.013	0.008
323	0.45	0.31	0.2	0.096	0.044	0.022	0.013	0.008
323.5	0.453	0.31	0.2	0.096	0.044	0.022	0.013	0.008
324	0.457	0.31	0.2	0.095	0.044	0.022	0.013	0.008
324.5	0.46	0.311	0.199	0.094	0.043	0.022	0.012	0.008
325	0.463	0.311	0.199	0.094	0.043	0.021	0.012	0.008
325.5	0.466	0.311	0.199	0.093	0.042	0.021	0.012	0.008
326	0.469	0.31	0.198	0.093	0.042	0.021	0.012	0.007
326.5	0.472	0.31	0.198	0.092	0.041	0.021	0.012	0.007
327	0.475	0.309	0.197	0.092	0.041	0.02	0.012	0.007
327.5	0.477	0.309	0.197	0.091	0.04	0.02	0.011	0.007
328	0.48	0.308	0.196	0.09	0.04	0.02	0.011	0.007
328.5	0.482	0.307	0.195	0.09	0.04	0.02	0.011	0.007
329	0.484	0.306	0.195	0.089	0.039	0.019	0.011	0.007
329.5	0.486	0.304	0.194	0.089	0.039	0.019	0.011	0.007
330	0.488	0.302	0.193	0.088	0.039	0.019	0.011	0.007
330.5	0.489	0.3	0.192	0.087	0.038	0.019	0.01	0.007
331	0.49	0.298	0.19	0.087	0.038	0.018	0.01	0.006
331.5	0.491	0.296	0.189	0.086	0.037	0.018	0.01	0.006
332	0.492	0.294	0.188	0.085	0.037	0.018	0.01	0.006
332.5	0.492	0.291	0.186	0.085	0.036	0.018	0.01	0.006
333	0.491	0.288	0.185	0.084	0.036	0.018	0.01	0.006
333.5	0.49	0.285	0.183	0.083	0.036	0.017	0.01	0.006
334	0.489	0.282	0.181	0.082	0.035	0.017	0.01	0.006
334.5	0.487	0.279	0.179	0.081	0.035	0.017	0.009	0.006
335	0.484	0.275	0.177	0.08	0.034	0.017	0.009	0.006
335.5	0.481	0.271	0.175	0.079	0.034	0.016	0.009	0.006
336	0.477	0.267	0.173	0.078	0.034	0.016	0.009	0.005
336.5	0.472	0.263	0.17	0.078	0.033	0.016	0.009	0.005
337	0.467	0.259	0.168	0.077	0.033	0.016	0.009	0.005
337.5	0.462	0.255	0.165	0.076	0.032	0.016	0.009	0.005
338	0.455	0.25	0.163	0.075	0.032	0.016	0.008	0.005
338.5	0.448	0.245	0.16	0.073	0.032	0.015	0.008	0.005
339	0.441	0.24	0.157	0.072	0.031	0.015	0.008	0.005
339.5	0.433	0.235	0.154	0.071	0.031	0.015	0.008	0.005
340	0.425	0.23	0.151	0.07	0.03	0.015	0.008	0.005
340.5	0.417	0.226	0.149	0.069	0.03	0.014	0.008	0.005
341	0.408	0.22	0.145	0.068	0.029	0.014	0.008	0.005
341.5	0.397	0.214	0.142	0.066	0.029	0.013	0.007	0.004
342	0.387	0.209	0.139	0.065	0.028	0.013	0.007	0.004
342.5	0.378	0.203	0.136	0.064	0.028	0.013	0.007	0.004
343	0.368	0.198	0.133	0.063	0.027	0.013	0.007	0.004
343.5	0.359	0.193	0.13	0.062	0.027	0.013	0.007	0.004
344	0.35	0.188	0.127	0.061	0.027	0.013	0.007	0.004
344.5	0.341	0.183	0.124	0.06	0.026	0.012	0.007	0.004
345	0.332	0.179	0.121	0.059	0.026	0.012	0.006	0.004
345.5	0.323	0.174	0.119	0.058	0.026	0.012	0.006	0.004
346	0.315	0.169	0.116	0.057	0.025	0.012	0.006	0.004
346.5	0.307	0.165	0.113	0.056	0.025	0.012	0.006	0.004
347	0.299	0.16	0.11	0.055	0.025	0.012	0.006	0.003
347.5	0.291	0.156	0.108	0.054	0.024	0.011	0.006	0.003
348	0.284	0.152	0.106	0.053	0.024	0.011	0.006	0.003
348.5	0.276	0.148	0.103	0.052	0.024	0.011	0.006	0.003
349	0.27	0.144	0.101	0.051	0.023	0.011	0.005	0.003
349.5	0.263	0.14	0.099	0.05	0.023	0.011	0.005	0.003
350	0.257	0.136	0.097	0.05	0.023	0.01	0.005	0.003
350.5	0.25	0.133	0.095	0.049	0.022	0.01	0.005	0.003
351	0.244	0.129	0.093	0.048	0.022	0.01	0.005	0.003
351.5	0.239	0.126	0.091	0.047	0.022	0.01	0.005	0.003
352	0.233	0.123	0.089	0.047	0.021	0.01	0.005	0.003
352.5	0.228	0.12	0.087	0.046	0.021	0.01	0.005	0.003
353	0.223	0.117	0.085	0.045	0.021	0.01	0.005	0.003
353.5	0.218	0.114	0.084	0.045	0.021	0.01	0.005	0.003
354	0.213	0.111	0.082	0.044	0.02	0.01	0.005	0.003
354.5	0.208	0.108	0.08	0.043	0.02	0.01	0.005	0.003
355	0.204	0.105	0.079	0.043	0.02	0.009	0.005	0.003
355.5	0.2	0.103	0.078	0.042	0.02	0.009	0.005	0.003
356	0.196	0.101	0.076	0.042	0.019	0.009	0.004	0.003
356.5	0.193	0.099	0.075	0.041	0.019	0.009	0.004	0.003
357	0.189	0.096	0.074	0.041	0.019	0.009	0.004	0.002
357.5	0.186	0.094	0.073	0.04	0.019	0.009	0.004	0.002
358	0.183	0.092	0.072	0.04	0.019	0.008	0.004	0.002
358.5	0.18	0.09	0.07	0.039	0.018	0.008	0.004	0.002
359	0.177	0.089	0.069	0.039	0.018	0.008	0.004	0.002
359.5	0.175	0.087	0.068	0.038	0.018	0.008	0.004	0.002
360	0.172	0.085	0.067	0.038	0.018	0.008	0.004	0.002
360.5	0.17	0.083	0.066	0.038	0.018	0.008	0.004	0.002
361	0.167	0.082	0.066	0.037	0.017	0.008	0.004	0.002
361.5	0.165	0.08	0.065	0.037	0.017	0.008	0.004	0.002
362	0.163	0.079	0.064	0.037	0.017	0.008	0.004	0.002
362.5	0.162	0.078	0.063	0.036	0.017	0.008	0.004	0.002
363	0.16	0.077	0.063	0.036	0.017	0.008	0.004	0.002
363.5	0.158	0.075	0.062	0.036	0.017	0.007	0.003	0.002
364	0.157	0.074	0.061	0.035	0.017	0.007	0.003	0.002
364.5	0.155	0.073	0.061	0.035	0.016	0.007	0.003	0.002
365	0.154	0.072	0.06	0.035	0.016	0.007	0.003	0.002
365.5	0.153	0.072	0.06	0.034	0.016	0.007	0.003	0.002
366	0.152	0.071	0.059	0.034	0.016	0.007	0.003	0.002
366.5	0.151	0.07	0.059	0.034	0.016	0.007	0.003	0.002
367	0.15	0.069	0.058	0.034	0.016	0.007	0.003	0.002
367.5	0.149	0.068	0.058	0.034	0.016	0.007	0.003	0.002
368	0.149	0.068	0.057	0.033	0.016	0.007	0.003	0.002
368.5	0.148	0.067	0.057	0.033	0.015	0.007	0.003	0.002
369	0.147	0.067	0.057	0.033	0.015	0.007	0.003	0.002
369.5	0.147	0.066	0.056	0.033	0.015	0.007	0.003	0.002
370	0.146	0.066	0.056	0.033	0.015	0.006	0.003	0.002
370.5	0.146	0.065	0.056	0.032	0.015	0.006	0.003	0.002
371	0.146	0.065	0.055	0.032	0.015	0.006	0.003	0.002
371.5	0.146	0.064	0.055	0.032	0.015	0.006	0.003	0.002
372	0.146	0.064	0.055	0.032	0.015	0.006	0.003	0.002
372.5	0.146	0.064	0.055	0.032	0.015	0.006	0.003	0.002
373	0.145	0.064	0.055	0.032	0.014	0.006	0.003	0.001
373.5	0.145	0.063	0.054	0.031	0.014	0.006	0.003	0.001
374	0.145	0.063	0.054	0.031	0.014	0.006	0.003	0.001
374.5	0.146	0.063	0.054	0.031	0.014	0.006	0.003	0.001
375	0.146	0.063	0.054	0.031	0.014	0.006	0.003	0.001
375.5	0.146	0.063	0.054	0.031	0.014	0.006	0.003	0.001
376	0.146	0.063	0.054	0.031	0.014	0.006	0.003	0.001
376.5	0.146	0.063	0.054	0.031	0.014	0.006	0.003	0.001
377	0.147	0.063	0.054	0.031	0.014	0.006	0.003	0.001
377.5	0.147	0.063	0.054	0.031	0.014	0.006	0.003	0.001
378	0.148	0.063	0.054	0.031	0.014	0.006	0.003	0.001
378.5	0.148	0.063	0.054	0.031	0.014	0.006	0.003	0.001
379	0.149	0.063	0.054	0.031	0.014	0.006	0.003	0.001
379.5	0.149	0.063	0.054	0.031	0.013	0.005	0.002	0.001
380	0.15	0.063	0.054	0.031	0.013	0.005	0.002	0.001
380.5	0.15	0.063	0.054	0.031	0.013	0.005	0.002	0.001
381	0.151	0.063	0.054	0.031	0.013	0.005	0.002	0.001
381.5	0.152	0.063	0.054	0.031	0.013	0.005	0.002	0.001
382	0.153	0.063	0.054	0.031	0.013	0.005	0.002	0.001
382.5	0.153	0.064	0.054	0.031	0.013	0.005	0.002	0.001
383	0.154	0.064	0.054	0.031	0.013	0.005	0.002	0.001
383.5	0.155	0.064	0.054	0.031	0.013	0.005	0.002	0.001
384	0.156	0.064	0.054	0.031	0.013	0.005	0.002	0.001
384.5	0.157	0.065	0.055	0.03	0.013	0.005	0.002	0.001
385	0.158	0.065	0.055	0.03	0.013	0.005	0.002	0.001
385.5	0.16	0.065	0.055	0.03	0.013	0.005	0.002	0.001
386	0.161	0.065	0.055	0.03	0.013	0.005	0.002	0.001
386.5	0.162	0.066	0.055	0.03	0.013	0.005	0.002	0.001
387	0.163	0.066	0.055	0.03	0.013	0.005	0.002	0.001
387.5	0.164	0.067	0.056	0.03	0.013	0.005	0.002	0.001
388	0.166	0.067	0.056	0.03	0.013	0.005	0.002	0.001
388.5	0.167	0.067	0.056	0.03	0.013	0.005	0.002	0.001
389	0.168	0.068	0.056	0.03	0.013	0.005	0.002	0.001
389.5	0.17	0.068	0.056	0.03	0.013	0.005	0.002	0.001
390	0.171	0.068	0.056	0.03	0.012	0.005	0.002	0.001
390.5	0.172	0.069	0.057	0.03	0.012	0.005	0.002	0.001
391	0.174	0.069	0.057	0.03	0.012	0.005	0.002	0.001
391.5	0.175	0.069	0.057	0.03	0.012	0.005	0.002	0.001
392	0.177	0.07	0.057	0.03	0.012	0.005	0.002	0.001
392.5	0.178	0.07	0.057	0.03	0.012	0.005	0.002	0.001
393	0.18	0.071	0.058	0.03	0.012	0.005	0.002	0.001
393.5	0.181	0.071	0.058	0.03	0.012	0.005	0.002	0.001
394	0.183	0.072	0.058	0.03	0.012	0.005	0.002	0.001
394.5	0.184	0.072	0.058	0.03	0.012	0.005	0.002	0.001
395	0.185	0.072	0.058	0.03	0.012	0.005	0.002	0.001
395.5	0.187	0.073	0.059	0.03	0.012	0.005	0.002	0.001
396	0.188	0.073	0.059	0.03	0.012	0.005	0.002	0.001
396.5	0.19	0.073	0.059	0.03	0.012	0.005	0.002	0.001
397	0.191	0.074	0.059	0.03	0.012	0.005	0.002	0.001
397.5	0.192	0.074	0.059	0.03	0.012	0.005	0.002	0.001
398	0.193	0.074	0.059	0.03	0.012	0.004	0.002	0.001
398.5	0.194	0.075	0.06	0.03	0.012	0.004	0.002	0.001
399	0.196	0.075	0.06	0.03	0.012	0.005	0.002	0.001
399.5	0.197	0.075	0.06	0.03	0.012	0.004	0.002	0.001
400	0.198	0.075	0.06	0.03	0.012	0.004	0.002	0.001
400.5	0.199	0.076	0.06	0.03	0.012	0.004	0.002	0.001
401	0.2	0.076	0.06	0.03	0.012	0.004	0.002	0.001
401.5	0.201	0.076	0.061	0.03	0.011	0.004	0.002	0.001
402	0.202	0.077	0.061	0.03	0.011	0.004	0.002	0.001
402.5	0.203	0.077	0.061	0.03	0.011	0.004	0.002	0.001
403	0.204	0.077	0.061	0.03	0.011	0.004	0.002	0.001
403.5	0.205	0.077	0.061	0.03	0.011	0.004	0.002	0.001
404	0.206	0.078	0.061	0.03	0.011	0.004	0.002	0.001
404.5	0.207	0.078	0.061	0.03	0.011	0.004	0.002	0.001
405	0.208	0.078	0.061	0.03	0.011	0.004	0.002	0.001
405.5	0.209	0.078	0.061	0.03	0.011	0.004	0.002	0.001
406	0.21	0.079	0.062	0.03	0.011	0.004	0.002	0.001
406.5	0.211	0.079	0.062	0.03	0.011	0.004	0.002	0.001
407	0.212	0.079	0.062	0.03	0.011	0.004	0.002	0.001
407.5	0.213	0.079	0.062	0.03	0.011	0.004	0.002	0.001
408	0.214	0.08	0.062	0.03	0.011	0.004	0.002	0.001
408.5	0.215	0.08	0.062	0.03	0.011	0.004	0.002	0.001
409	0.216	0.08	0.062	0.03	0.011	0.004	0.002	0.001
409.5	0.217	0.081	0.063	0.03	0.011	0.004	0.001	0.001
410	0.218	0.081	0.063	0.03	0.011	0.004	0.001	0.001
410.5	0.219	0.081	0.063	0.03	0.011	0.004	0.001	0.001
411	0.221	0.082	0.063	0.03	0.011	0.004	0.001	0.001
411.5	0.222	0.082	0.063	0.03	0.011	0.004	0.001	0.001
412	0.224	0.082	0.063	0.03	0.011	0.004	0.001	0.001
412.5	0.225	0.083	0.064	0.03	0.011	0.004	0.001	0.001
413	0.226	0.083	0.064	0.03	0.011	0.004	0.001	0.001
413.5	0.228	0.084	0.064	0.03	0.01	0.004	0.001	0.001
414	0.229	0.084	0.064	0.03	0.01	0.004	0.001	0.001
414.5	0.231	0.084	0.065	0.03	0.01	0.004	0.001	0.001
415	0.232	0.085	0.065	0.03	0.01	0.003	0.001	0.001
415.5	0.234	0.086	0.065	0.03	0.01	0.003	0.001	0.001
416	0.236	0.086	0.065	0.03	0.01	0.003	0.001	0
416.5	0.237	0.086	0.066	0.03	0.01	0.003	0.001	0
417	0.239	0.087	0.066	0.03	0.01	0.003	0.001	0
417.5	0.241	0.087	0.066	0.03	0.01	0.003	0.001	0
418	0.243	0.088	0.066	0.031	0.01	0.003	0.001	0
418.5	0.244	0.088	0.067	0.031	0.01	0.003	0.001	0
419	0.246	0.089	0.067	0.031	0.01	0.003	0.001	0
419.5	0.248	0.089	0.067	0.031	0.01	0.003	0.001	0
420	0.25	0.09	0.067	0.031	0.01	0.003	0.001	0
420.5	0.251	0.09	0.068	0.031	0.01	0.003	0.001	0
421	0.253	0.091	0.068	0.031	0.01	0.003	0.001	0
421.5	0.255	0.091	0.068	0.031	0.01	0.003	0.001	0
422	0.257	0.092	0.068	0.031	0.01	0.003	0.001	0
422.5	0.258	0.092	0.069	0.031	0.01	0.003	0.001	0
423	0.26	0.093	0.069	0.031	0.01	0.003	0.001	0
423.5	0.262	0.093	0.069	0.031	0.01	0.003	0.001	0
424	0.263	0.094	0.069	0.031	0.01	0.003	0.001	0
424.5	0.265	0.094	0.069	0.031	0.01	0.003	0.001	0
425	0.266	0.094	0.07	0.031	0.01	0.003	0.001	0
425.5	0.268	0.095	0.07	0.031	0.01	0.003	0.001	0
426	0.269	0.095	0.07	0.031	0.01	0.003	0.001	0
426.5	0.271	0.095	0.07	0.031	0.01	0.003	0.001	0
427	0.272	0.096	0.071	0.031	0.01	0.003	0.001	0
427.5	0.273	0.096	0.071	0.031	0.01	0.003	0.001	0
428	0.275	0.097	0.071	0.031	0.01	0.003	0.001	0
428.5	0.276	0.097	0.071	0.031	0.01	0.003	0.001	0
429	0.278	0.097	0.072	0.031	0.01	0.003	0.001	0
429.5	0.279	0.098	0.072	0.031	0.01	0.003	0.001	0
430	0.281	0.098	0.072	0.031	0.01	0.003	0.001	0
430.5	0.282	0.099	0.072	0.031	0.01	0.003	0.001	0
431	0.283	0.099	0.072	0.031	0.01	0.003	0.001	0
431.5	0.285	0.099	0.073	0.031	0.01	0.003	0.001	0
432	0.286	0.1	0.073	0.031	0.01	0.003	0.001	0
432.5	0.287	0.1	0.073	0.031	0.01	0.003	0.001	0
433	0.289	0.101	0.073	0.031	0.01	0.003	0.001	0
433.5	0.29	0.101	0.073	0.031	0.009	0.003	0.001	0
434	0.292	0.101	0.074	0.031	0.009	0.003	0.001	0
434.5	0.293	0.102	0.074	0.031	0.009	0.003	0.001	0
435	0.295	0.102	0.074	0.031	0.009	0.003	0.001	0
435.5	0.297	0.103	0.075	0.032	0.009	0.003	0.001	0
436	0.298	0.103	0.075	0.032	0.009	0.003	0.001	0
436.5	0.3	0.104	0.075	0.032	0.009	0.003	0.001	0
437	0.302	0.104	0.076	0.032	0.009	0.003	0.001	0
437.5	0.305	0.105	0.076	0.032	0.009	0.003	0.001	0
438	0.307	0.106	0.077	0.032	0.009	0.003	0.001	0
438.5	0.309	0.107	0.077	0.032	0.009	0.003	0.001	0
439	0.311	0.107	0.077	0.032	0.009	0.002	0.001	0
439.5	0.313	0.108	0.078	0.033	0.009	0.002	0.001	0
440	0.316	0.109	0.078	0.033	0.009	0.002	0.001	0
440.5	0.318	0.11	0.079	0.033	0.009	0.002	0.001	0
441	0.321	0.11	0.079	0.033	0.009	0.002	0.001	0
441.5	0.324	0.111	0.08	0.033	0.009	0.002	0	0
442	0.327	0.112	0.081	0.033	0.009	0.002	0	0
442.5	0.33	0.113	0.081	0.033	0.009	0.002	0	0
443	0.333	0.114	0.082	0.034	0.009	0.002	0	0
443.5	0.336	0.115	0.082	0.034	0.009	0.002	0	0
444	0.339	0.116	0.083	0.034	0.009	0.002	0	0
444.5	0.343	0.117	0.084	0.034	0.009	0.002	0	0
445	0.346	0.118	0.084	0.034	0.009	0.002	0.001	0
445.5	0.35	0.119	0.085	0.035	0.009	0.002	0	0
446	0.354	0.121	0.086	0.035	0.009	0.002	0	0
446.5	0.358	0.122	0.087	0.035	0.009	0.002	0	0
447	0.362	0.123	0.088	0.035	0.009	0.002	0	0
447.5	0.366	0.124	0.088	0.036	0.009	0.002	0	0
448	0.37	0.125	0.089	0.036	0.009	0.002	0	0
448.5	0.374	0.127	0.09	0.036	0.009	0.002	0	0
449	0.379	0.128	0.091	0.036	0.009	0.002	0	0
449.5	0.383	0.129	0.092	0.036	0.009	0.002	0	0
450	0.388	0.131	0.093	0.037	0.01	0.002	0	0
450.5	0.392	0.132	0.094	0.037	0.01	0.002	0	0
451	0.398	0.134	0.094	0.037	0.01	0.002	0	0
451.5	0.403	0.135	0.095	0.038	0.01	0.002	0	0
452	0.408	0.137	0.096	0.038	0.01	0.002	0	0
452.5	0.413	0.139	0.097	0.038	0.01	0.002	0	0
453	0.418	0.14	0.098	0.039	0.01	0.002	0	0
453.5	0.423	0.142	0.099	0.039	0.01	0.002	0	0
454	0.429	0.143	0.1	0.039	0.01	0.002	0	0
454.5	0.434	0.145	0.102	0.039	0.01	0.002	0	0
455	0.44	0.147	0.103	0.04	0.01	0.002	0	0
455.5	0.446	0.148	0.104	0.04	0.01	0.002	0	0
456	0.452	0.15	0.105	0.04	0.01	0.002	0	0
456.5	0.458	0.152	0.106	0.041	0.01	0.002	0	0
457	0.464	0.154	0.107	0.041	0.01	0.002	0	0
457.5	0.47	0.156	0.108	0.041	0.01	0.002	0	0
458	0.476	0.157	0.109	0.042	0.01	0.002	0	0
458.5	0.482	0.159	0.111	0.042	0.01	0.002	0	0
459	0.488	0.161	0.112	0.042	0.01	0.002	0	0
459.5	0.494	0.163	0.113	0.043	0.01	0.002	0	0
460	0.5	0.165	0.114	0.043	0.01	0.002	0	0
460.5	0.506	0.166	0.115	0.043	0.01	0.002	0	0
461	0.512	0.168	0.116	0.044	0.01	0.002	0	0
461.5	0.519	0.17	0.118	0.044	0.01	0.002	0	0
462	0.525	0.172	0.119	0.044	0.01	0.002	0	0
462.5	0.531	0.174	0.12	0.045	0.01	0.002	0	0
463	0.537	0.176	0.121	0.045	0.01	0.002	0	0
463.5	0.543	0.178	0.122	0.046	0.01	0.002	0	0
464	0.549	0.18	0.124	0.046	0.01	0.002	0	0
464.5	0.556	0.182	0.125	0.046	0.01	0.002	0	0
465	0.563	0.184	0.126	0.047	0.01	0.002	0	0
465.5	0.57	0.186	0.127	0.047	0.01	0.002	0	0
466	0.576	0.188	0.129	0.047	0.01	0.002	0	0
466.5	0.583	0.19	0.13	0.048	0.01	0.002	0	0
467	0.589	0.192	0.131	0.048	0.01	0.002	0	0
467.5	0.596	0.194	0.132	0.048	0.01	0.002	0	0
468	0.603	0.196	0.134	0.049	0.01	0.002	0	0
468.5	0.609	0.198	0.135	0.049	0.011	0.002	0	0
469	0.616	0.2	0.136	0.049	0.011	0.002	0	0
469.5	0.623	0.202	0.137	0.05	0.011	0.002	0	0
470	0.629	0.204	0.139	0.05	0.011	0.002	0	0
470.5	0.636	0.206	0.14	0.05	0.011	0.002	0	0
471	0.642	0.207	0.141	0.051	0.011	0.002	0	0
471.5	0.649	0.209	0.142	0.051	0.011	0.002	0	0
472	0.655	0.211	0.144	0.052	0.011	0.002	0	0
472.5	0.662	0.213	0.145	0.052	0.011	0.002	0	0
473	0.668	0.215	0.146	0.052	0.011	0.002	0	0
473.5	0.675	0.217	0.147	0.052	0.011	0.002	0	0
474	0.681	0.219	0.148	0.053	0.011	0.002	0	0
474.5	0.688	0.221	0.15	0.053	0.011	0.002	0	0
475	0.694	0.223	0.151	0.053	0.011	0.002	0	0
475.5	0.701	0.225	0.152	0.054	0.011	0.002	0	0
476	0.707	0.227	0.153	0.054	0.011	0.002	0	0
476.5	0.714	0.229	0.154	0.054	0.011	0.002	0	0
477	0.721	0.231	0.155	0.055	0.011	0.002	0	0
477.5	0.727	0.233	0.157	0.055	0.011	0.002	0	0
478	0.734	0.235	0.158	0.055	0.011	0.002	0	0
478.5	0.741	0.237	0.159	0.056	0.011	0.002	0	0
479	0.747	0.238	0.16	0.056	0.011	0.002	0	0
479.5	0.753	0.24	0.161	0.056	0.011	0.002	0	0
480	0.759	0.242	0.162	0.056	0.011	0.002	0	0
480.5	0.765	0.243	0.163	0.057	0.011	0.002	0	0
481	0.771	0.245	0.164	0.057	0.011	0.002	0	0
481.5	0.777	0.247	0.165	0.057	0.011	0.002	0	0
482	0.783	0.249	0.166	0.057	0.011	0.002	0	0
482.5	0.789	0.251	0.167	0.057	0.011	0.002	0	0
483	0.795	0.252	0.168	0.058	0.011	0.002	0	0
483.5	0.801	0.254	0.169	0.058	0.011	0.002	0	0
484	0.807	0.255	0.17	0.058	0.011	0.002	0	0
484.5	0.813	0.257	0.171	0.058	0.011	0.002	0	0
485	0.818	0.259	0.172	0.059	0.011	0.002	0	0
485.5	0.824	0.26	0.173	0.059	0.011	0.002	0	0
486	0.829	0.262	0.174	0.059	0.011	0.002	0	0
486.5	0.834	0.263	0.175	0.059	0.011	0.002	0	0
487	0.839	0.265	0.176	0.059	0.011	0.002	0	0
487.5	0.844	0.266	0.177	0.06	0.011	0.002	0	0
488	0.849	0.267	0.177	0.06	0.011	0.002	0	0
488.5	0.854	0.269	0.178	0.06	0.011	0.002	0	0
489	0.859	0.27	0.179	0.06	0.011	0.002	0	0
489.5	0.864	0.271	0.18	0.06	0.011	0.002	0	0
490	0.869	0.273	0.18	0.06	0.011	0.002	0	0
490.5	0.874	0.274	0.181	0.061	0.011	0.002	0	0
491	0.878	0.275	0.182	0.061	0.011	0.002	0	0
491.5	0.882	0.277	0.183	0.061	0.011	0.002	0	0
492	0.887	0.278	0.183	0.061	0.011	0.002	0	0
492.5	0.891	0.279	0.184	0.061	0.011	0.002	0	0
493	0.895	0.28	0.185	0.061	0.011	0.002	0	0
493.5	0.899	0.281	0.185	0.061	0.011	0.002	0	0
494	0.903	0.282	0.186	0.062	0.011	0.002	0	0
494.5	0.907	0.283	0.187	0.062	0.011	0.002	0	0
495	0.911	0.284	0.187	0.062	0.011	0.002	0	0
495.5	0.914	0.285	0.188	0.062	0.011	0.002	0	0
496	0.917	0.286	0.188	0.062	0.011	0.002	0	0
496.5	0.921	0.287	0.189	0.062	0.011	0.002	0	0
497	0.924	0.288	0.189	0.062	0.011	0.002	0	0
497.5	0.927	0.289	0.19	0.062	0.011	0.002	0	0
498	0.93	0.29	0.19	0.062	0.011	0.002	0	0
498.5	0.933	0.29	0.19	0.062	0.011	0.002	0	0
499	0.936	0.291	0.191	0.062	0.011	0.002	0	0
499.5	0.938	0.292	0.191	0.062	0.01	0.002	0	0
500	0.941	0.292	0.191	0.062	0.01	0.002	0	0
500.5	0.943	0.293	0.192	0.062	0.01	0.002	0	0
501	0.945	0.294	0.192	0.062	0.01	0.002	0	0
501.5	0.947	0.294	0.192	0.062	0.01	0.001	0	0
502	0.949	0.294	0.193	0.062	0.01	0.001	0	0
502.5	0.951	0.295	0.193	0.062	0.01	0.002	0	0
503	0.952	0.295	0.193	0.062	0.01	0.001	0	0
503.5	0.954	0.296	0.193	0.062	0.01	0.001	0	0
504	0.955	0.296	0.193	0.062	0.01	0.001	0	0
504.5	0.956	0.296	0.193	0.062	0.01	0.001	0	0
505	0.957	0.296	0.193	0.062	0.01	0.001	0	0
505.5	0.957	0.296	0.193	0.061	0.01	0.001	0	0
506	0.958	0.296	0.193	0.061	0.01	0.001	0	0
506.5	0.958	0.296	0.193	0.061	0.01	0.001	0	0
507	0.958	0.296	0.193	0.061	0.01	0.001	0	0
507.5	0.958	0.296	0.192	0.061	0.01	0.001	0	0
508	0.958	0.296	0.192	0.061	0.01	0.001	0	0
508.5	0.958	0.296	0.192	0.06	0.01	0.001	0	0
509	0.957	0.295	0.191	0.06	0.01	0.001	0	0
509.5	0.957	0.295	0.191	0.06	0.01	0.001	0	0
510	0.956	0.295	0.191	0.06	0.009	0.001	0	0
510.5	0.954	0.294	0.19	0.059	0.009	0.001	0	0
511	0.953	0.293	0.19	0.059	0.009	0.001	0	0
511.5	0.952	0.293	0.189	0.059	0.009	0.001	0	0
512	0.95	0.292	0.189	0.059	0.009	0.001	0	0
512.5	0.948	0.292	0.188	0.058	0.009	0.001	0	0
513	0.946	0.291	0.187	0.058	0.009	0.001	0	0
513.5	0.944	0.29	0.187	0.057	0.009	0.001	0	0
514	0.942	0.289	0.186	0.057	0.009	0.001	0	0
514.5	0.939	0.288	0.185	0.057	0.008	0.001	0	0
515	0.936	0.287	0.184	0.056	0.008	0.001	0	0
515.5	0.934	0.286	0.183	0.056	0.008	0.001	0	0
516	0.93	0.285	0.183	0.056	0.008	0.001	0	0
516.5	0.927	0.284	0.182	0.055	0.008	0.001	0	0
517	0.924	0.283	0.181	0.055	0.008	0.001	0	0
517.5	0.921	0.282	0.18	0.054	0.008	0.001	0	0
518	0.917	0.281	0.179	0.054	0.008	0.001	0	0
518.5	0.913	0.279	0.178	0.053	0.008	0.001	0	0
519	0.909	0.278	0.177	0.053	0.008	0.001	0	0
519.5	0.905	0.276	0.176	0.052	0.007	0.001	0	0
520	0.901	0.275	0.175	0.052	0.007	0.001	0	0
520.5	0.897	0.273	0.174	0.052	0.007	0.001	0	0
521	0.892	0.272	0.172	0.051	0.007	0.001	0	0
521.5	0.888	0.271	0.171	0.051	0.007	0.001	0	0
522	0.884	0.269	0.17	0.05	0.007	0.001	0	0
522.5	0.879	0.267	0.169	0.049	0.007	0.001	0	0
523	0.874	0.266	0.168	0.049	0.007	0.001	0	0
523.5	0.869	0.264	0.166	0.049	0.006	0.001	0	0
524	0.864	0.262	0.165	0.048	0.006	0.001	0	0
524.5	0.859	0.26	0.164	0.048	0.006	0.001	0	0
525	0.854	0.259	0.163	0.047	0.006	0.001	0	0
525.5	0.848	0.257	0.162	0.047	0.006	0.001	0	0
526	0.842	0.255	0.16	0.046	0.006	0.001	0	0
526.5	0.836	0.253	0.159	0.046	0.006	0.001	0	0
527	0.83	0.251	0.157	0.045	0.006	0	0	0
527.5	0.825	0.249	0.156	0.045	0.005	0	0	0
528	0.818	0.247	0.155	0.044	0.005	0	0	0
528.5	0.812	0.245	0.153	0.044	0.005	0	0	0
529	0.806	0.244	0.152	0.043	0.005	0	0	0
529.5	0.799	0.242	0.151	0.043	0.005	0	0	0
530	0.793	0.24	0.149	0.042	0.005	0	0	0
530.5	0.786	0.237	0.148	0.042	0.005	0	0	0
531	0.78	0.235	0.146	0.041	0.005	0	0	0
531.5	0.773	0.233	0.145	0.041	0.005	0	0	0
532	0.767	0.231	0.144	0.04	0.005	0	0	0
532.5	0.76	0.229	0.142	0.04	0.005	0	0	0
533	0.754	0.227	0.141	0.039	0.005	0	0	0
533.5	0.747	0.225	0.14	0.039	0.005	0	0	0
534	0.739	0.223	0.138	0.038	0.004	0	0	0
534.5	0.732	0.22	0.137	0.038	0.004	0	0	0
535	0.725	0.218	0.135	0.037	0.004	0	0	0
535.5	0.717	0.216	0.134	0.037	0.004	0	0	0
536	0.71	0.214	0.132	0.036	0.004	0	0	0
536.5	0.702	0.211	0.131	0.036	0.004	0	0	0
537	0.692	0.209	0.129	0.035	0.004	0	-0.001	0
537.5	0.685	0.206	0.127	0.035	0.004	0	-0.001	0
538	0.676	0.204	0.126	0.034	0.004	0	-0.001	0
538.5	0.669	0.201	0.124	0.034	0.004	0	-0.001	0
539	0.661	0.199	0.123	0.033	0.004	0	-0.001	0
539.5	0.653	0.197	0.121	0.033	0.003	0	-0.001	0
540	0.646	0.194	0.12	0.032	0.003	0	-0.001	0
540.5	0.639	0.192	0.118	0.032	0.003	0	-0.001	0
541	0.631	0.19	0.117	0.032	0.003	0	0	0
541.5	0.622	0.187	0.115	0.031	0.003	0	0	0
542	0.614	0.185	0.114	0.031	0.003	0	-0.001	0
542.5	0.606	0.182	0.112	0.03	0.003	0	0	0
543	0.598	0.18	0.111	0.03	0.003	0	0	0
543.5	0.589	0.177	0.109	0.029	0.003	0	-0.001	0
544	0.581	0.175	0.107	0.029	0.003	0	-0.001	0
544.5	0.572	0.172	0.106	0.028	0.003	0	-0.001	0
545	0.564	0.169	0.104	0.028	0.003	0	-0.001	0
545.5	0.555	0.167	0.103	0.028	0.003	0	-0.001	0
546	0.547	0.164	0.101	0.027	0.003	0	-0.001	0
546.5	0.538	0.162	0.099	0.027	0.003	0	-0.001	0
547	0.529	0.159	0.098	0.026	0.003	0	-0.001	0
547.5	0.52	0.157	0.096	0.026	0.003	0	-0.001	0
548	0.511	0.154	0.095	0.025	0.002	0	-0.001	0
548.5	0.502	0.151	0.093	0.025	0.002	0	-0.001	0
549	0.492	0.148	0.091	0.025	0.002	0	-0.001	0
549.5	0.483	0.146	0.089	0.024	0.002	0	-0.001	0
550	0.473	0.143	0.088	0.023	0.002	0	-0.001	0
550.5	0.463	0.14	0.086	0.023	0.002	0	-0.001	0
551	0.454	0.137	0.084	0.022	0.002	0	-0.001	0
551.5	0.444	0.134	0.083	0.022	0.002	0	-0.001	0
552	0.434	0.131	0.081	0.022	0.002	0	-0.001	0
552.5	0.423	0.128	0.079	0.021	0.002	0	-0.001	0
553	0.413	0.125	0.077	0.021	0.002	0	-0.001	0
553.5	0.403	0.122	0.075	0.02	0.002	0	-0.001	0
554	0.393	0.119	0.073	0.02	0.002	0	-0.001	0
554.5	0.383	0.116	0.072	0.019	0.002	0	-0.001	0
555	0.373	0.113	0.07	0.019	0.002	0	-0.001	0
555.5	0.364	0.11	0.068	0.018	0.002	0	-0.001	0
556	0.354	0.108	0.067	0.018	0.002	0	-0.001	0
556.5	0.345	0.105	0.065	0.017	0.002	0	-0.001	0
557	0.335	0.102	0.063	0.017	0.002	0	-0.001	0
557.5	0.325	0.099	0.061	0.016	0.001	0	-0.001	0
558	0.316	0.096	0.06	0.016	0.001	0	-0.001	0
558.5	0.306	0.093	0.058	0.016	0.001	0	-0.001	0
559	0.297	0.09	0.056	0.015	0.001	0	-0.001	0
559.5	0.287	0.088	0.054	0.015	0.001	0	-0.001	0
560	0.278	0.085	0.053	0.014	0.001	0	-0.001	0
560.5	0.27	0.082	0.051	0.014	0.001	0	-0.001	0
561	0.261	0.08	0.05	0.013	0.001	0	-0.001	0
561.5	0.252	0.077	0.048	0.013	0.001	0	-0.001	0
562	0.244	0.075	0.047	0.013	0.001	0	-0.001	0
562.5	0.235	0.072	0.045	0.012	0.001	-0.001	-0.001	0
563	0.227	0.07	0.044	0.012	0.001	-0.001	-0.001	0
563.5	0.219	0.068	0.042	0.011	0.001	-0.001	-0.001	0
564	0.212	0.065	0.041	0.011	0.001	-0.001	-0.001	0
564.5	0.204	0.063	0.039	0.011	0.001	-0.001	-0.001	0
565	0.197	0.061	0.038	0.01	0.001	-0.001	-0.001	0
565.5	0.19	0.059	0.037	0.01	0.001	-0.001	-0.001	0
566	0.182	0.057	0.036	0.01	0.001	-0.001	-0.001	0
566.5	0.175	0.054	0.034	0.009	0.001	-0.001	-0.001	0
567	0.168	0.052	0.033	0.009	0	-0.001	-0.001	0
567.5	0.162	0.051	0.032	0.009	0	-0.001	-0.001	0
568	0.155	0.049	0.031	0.008	0	-0.001	-0.001	0
568.5	0.149	0.047	0.03	0.008	0	-0.001	-0.001	0
569	0.143	0.045	0.029	0.008	0	-0.001	-0.001	0
569.5	0.138	0.043	0.028	0.008	0	-0.001	-0.001	0
570	0.132	0.042	0.027	0.007	0	-0.001	-0.001	0
570.5	0.126	0.04	0.026	0.007	0	-0.001	-0.001	0
571	0.121	0.039	0.025	0.007	0	-0.001	-0.001	0
571.5	0.116	0.037	0.024	0.006	0	-0.001	-0.001	0
572	0.111	0.036	0.023	0.006	0	-0.001	-0.001	0
572.5	0.106	0.034	0.022	0.006	0	-0.001	-0.001	0
573	0.101	0.033	0.021	0.006	0	-0.001	-0.001	0
573.5	0.097	0.031	0.02	0.005	0	-0.001	-0.001	0
574	0.092	0.03	0.019	0.005	0	-0.001	-0.001	0
574.5	0.088	0.029	0.019	0.005	0	-0.001	-0.001	0
575	0.084	0.028	0.018	0.005	0	-0.001	-0.001	0
575.5	0.08	0.026	0.017	0.005	0	-0.001	-0.001	0
576	0.076	0.025	0.016	0.005	0	-0.001	-0.001	0
576.5	0.073	0.024	0.016	0.004	0	-0.001	-0.001	0
577	0.069	0.023	0.015	0.004	0	-0.001	-0.001	0
577.5	0.066	0.022	0.015	0.004	0	-0.001	-0.001	0
578	0.063	0.021	0.014	0.004	0	-0.001	-0.001	0
578.5	0.06	0.02	0.013	0.004	0	-0.001	-0.001	0
579	0.057	0.019	0.013	0.003	0	-0.001	-0.001	0
579.5	0.054	0.018	0.012	0.003	0	-0.001	-0.001	0
580	0.051	0.017	0.012	0.003	0	-0.001	-0.001	0
580.5	0.049	0.017	0.011	0.003	0	-0.001	-0.001	0
581	0.046	0.016	0.011	0.003	0	-0.001	-0.001	0
581.5	0.044	0.015	0.01	0.003	0	-0.001	-0.001	0
582	0.042	0.015	0.01	0.003	0	-0.001	-0.001	0
582.5	0.04	0.014	0.01	0.003	0	-0.001	-0.001	0
583	0.038	0.014	0.009	0.003	0	-0.001	-0.001	0
583.5	0.036	0.013	0.009	0.002	0	-0.001	-0.001	0
584	0.034	0.012	0.008	0.002	0	-0.001	-0.001	0
584.5	0.032	0.012	0.008	0.002	0	-0.001	-0.001	0
585	0.031	0.011	0.008	0.002	0	-0.001	-0.001	0
585.5	0.029	0.011	0.007	0.002	0	-0.001	-0.001	0
586	0.028	0.01	0.007	0.002	0	-0.001	-0.001	0
586.5	0.026	0.01	0.007	0.002	0	-0.001	-0.001	0
587	0.025	0.01	0.006	0.002	0	-0.001	-0.001	0
587.5	0.024	0.009	0.006	0.002	0	-0.001	-0.001	0
588	0.022	0.009	0.006	0.002	0	-0.001	-0.001	0
588.5	0.021	0.008	0.006	0.002	0	-0.001	-0.001	0
589	0.02	0.008	0.005	0.001	0	-0.001	-0.001	0
589.5	0.019	0.008	0.005	0.001	0	-0.001	-0.001	0
590	0.018	0.007	0.005	0.001	0	-0.001	-0.001	0
590.5	0.017	0.007	0.005	0.001	0	-0.001	-0.001	0
591	0.016	0.007	0.005	0.001	0	-0.001	-0.001	0
591.5	0.016	0.006	0.004	0.001	0	-0.001	-0.001	0
592	0.015	0.006	0.004	0.001	0	-0.001	-0.001	0
592.5	0.014	0.006	0.004	0.001	0	-0.001	-0.001	0
593	0.013	0.005	0.004	0.001	0	-0.001	-0.001	0
593.5	0.012	0.005	0.004	0.001	0	-0.001	-0.001	0
594	0.012	0.005	0.004	0.001	0	-0.001	-0.001	0
594.5	0.011	0.005	0.003	0.001	0	-0.001	-0.001	0
595	0.011	0.005	0.003	0.001	0	-0.001	-0.001	0
595.5	0.01	0.004	0.003	0.001	0	-0.001	-0.001	0
596	0.01	0.004	0.003	0.001	0	-0.001	-0.001	0
596.5	0.009	0.004	0.003	0.001	0	-0.001	-0.001	0
597	0.009	0.004	0.003	0.001	0	-0.001	-0.001	0
597.5	0.008	0.004	0.003	0.001	0	-0.001	-0.001	0
598	0.008	0.004	0.003	0.001	0	-0.001	-0.001	0
598.5	0.007	0.003	0.002	0.001	0	-0.001	-0.001	0
599	0.007	0.003	0.002	0.001	0	-0.001	-0.001	0
599.5	0.006	0.003	0.002	0	0	-0.001	-0.001	0
600	0.006	0.003	0.002	0	0	-0.001	-0.001	0
600.5	0.006	0.003	0.002	0	0	-0.001	-0.001	0
601	0.005	0.003	0.002	0	0	-0.001	-0.001	0
601.5	0.005	0.003	0.002	0	0	-0.001	-0.001	0
602	0.005	0.002	0.002	0	0	-0.001	-0.001	0
602.5	0.005	0.002	0.002	0	0	-0.001	-0.001	0
603	0.004	0.002	0.002	0	0	-0.001	-0.001	0
603.5	0.004	0.002	0.002	0	0	-0.001	-0.001	0
604	0.004	0.002	0.002	0	0	-0.001	-0.001	0
604.5	0.003	0.002	0.001	0	0	-0.001	-0.001	0
605	0.003	0.002	0.001	0	0	-0.001	-0.001	0
605.5	0.003	0.002	0.001	0	0	-0.001	-0.001	0
606	0.003	0.002	0.001	0	0	-0.001	-0.001	0
606.5	0.003	0.002	0.001	0	-0.001	-0.001	-0.001	0
607	0.003	0.002	0.001	0	-0.001	-0.001	-0.001	0
607.5	0.002	0.002	0.001	0	-0.001	-0.001	-0.001	0
608	0.002	0.001	0.001	0	-0.001	-0.001	-0.001	0
608.5	0.002	0.001	0.001	0	-0.001	-0.001	-0.001	0
609	0.002	0.001	0.001	0	-0.001	-0.001	-0.001	0
609.5	0.002	0.001	0.001	0	-0.001	-0.001	-0.001	0
610	0.002	0.001	0.001	0	-0.001	-0.001	-0.001	0
610.5	0.002	0.001	0.001	0	-0.001	-0.001	-0.001	0
611	0.002	0.001	0.001	0	-0.001	-0.001	-0.001	0
611.5	0.001	0.001	0.001	0	-0.001	-0.001	-0.001	0
612	0.001	0.001	0.001	0	-0.001	-0.001	-0.001	0
612.5	0.001	0.001	0.001	0	-0.001	-0.001	-0.001	0
613	0.001	0.001	0	0	-0.001	-0.001	-0.001	0
613.5	0.001	0.001	0	0	-0.001	-0.001	-0.001	0
614	0.001	0.001	0	0	-0.001	-0.001	-0.001	0
614.5	0.001	0.001	0	0	-0.001	-0.001	-0.001	0
615	0.001	0.001	0	0	-0.001	-0.001	-0.001	0
615.5	0.001	0.001	0	0	-0.001	-0.001	-0.001	0
616	0.001	0.001	0	0	-0.001	-0.001	-0.001	0
616.5	0.001	0.001	0	0	-0.001	-0.001	-0.001	0
617	0	0.001	0	0	0	-0.001	-0.001	0
617.5	0	0.001	0	0	0	-0.001	-0.001	0
618	0	0	0	0	-0.001	-0.001	-0.001	0
618.5	0	0	0	0	-0.001	-0.001	-0.001	0
619	0	0	0	0	-0.001	-0.001	-0.001	0
619.5	0	0	0	0	-0.001	-0.001	-0.001	0
620	0	0	0	0	-0.001	-0.001	-0.001	0
620.5	0	0	0	0	-0.001	-0.001	-0.001	0
621	0	0	0	0	-0.001	-0.001	-0.001	0
621.5	0	0	0	0	-0.001	-0.001	-0.001	0
622	0	0	0	0	-0.001	-0.001	-0.001	0
622.5	0	0	0	0	-0.001	-0.001	-0.001	0
623	0	0	0	0	-0.001	-0.001	-0.001	0
623.5	0	0	0	0	-0.001	-0.001	-0.001	0
624	0	0	0	0	-0.001	-0.001	-0.001	0
624.5	0	0	0	0	-0.001	-0.001	-0.001	0
625	0	0	0	0	-0.001	-0.001	-0.001	0
625.5	0	0	0	0	-0.001	-0.001	-0.001	0
626	0	0	0	-0.001	-0.001	-0.001	-0.001	0
626.5	0	0	0	-0.001	-0.001	-0.001	-0.001	0
627	0	0	0	0	-0.001	-0.001	-0.001	0
627.5	0	0	0	0	-0.001	-0.001	-0.001	0
628	0	0	0	0	-0.001	-0.001	-0.001	0
628.5	0	0	0	0	-0.001	-0.001	-0.001	0
629	0	0	0	0	-0.001	-0.001	-0.001	0
629.5	0	0	0	0	-0.001	-0.001	-0.001	0
630	0	0	0	0	-0.001	-0.001	-0.001	0
630.5	0	0	0	0	-0.001	-0.001	-0.001	0
631	0	0	0	0	-0.001	-0.001	-0.001	0
631.5	0	0	0	0	-0.001	-0.001	-0.001	0
632	0	0	0	0	-0.001	-0.001	-0.001	0
632.5	0	0	0	0	-0.001	-0.001	-0.001	0
633	0	0	0	0	-0.001	-0.001	-0.001	0
633.5	0	0	0	0	-0.001	-0.001	-0.001	0
634	0	0	0	0	-0.001	-0.001	-0.001	0
634.5	0	0	0	0	-0.001	-0.001	-0.001	0
635	-0.001	0	0	0	-0.001	-0.001	-0.001	0
635.5	-0.001	0	0	0	-0.001	-0.001	-0.001	0
636	-0.001	0	0	0	-0.001	-0.001	-0.001	0
636.5	-0.001	0	0	0	-0.001	-0.001	-0.001	0
637	-0.001	0	0	-0.001	-0.001	-0.001	-0.001	0
637.5	-0.001	0	0	-0.001	-0.001	-0.001	-0.001	0
638	-0.001	0	0	-0.001	-0.001	-0.001	-0.001	0
638.5	-0.001	0	0	-0.001	-0.001	-0.001	-0.001	0
639	-0.001	0	0	-0.001	-0.001	-0.001	-0.001	0
639.5	-0.001	0	0	-0.001	-0.001	-0.001	-0.001	0
640	-0.001	0	0	-0.001	-0.001	-0.001	-0.001	0
640.5	-0.001	0	0	-0.001	-0.001	-0.001	-0.001	0
641	-0.001	0	0	-0.001	-0.001	-0.001	-0.001	0
641.5	-0.001	0	0	-0.001	-0.001	-0.001	-0.001	0
642	-0.001	0	0	-0.001	-0.001	-0.001	-0.001	0
642.5	-0.001	0	0	-0.001	-0.001	-0.001	-0.001	0
643	-0.001	0	0	-0.001	-0.001	-0.001	-0.001	0
643.5	-0.001	0	0	-0.001	-0.001	-0.001	-0.001	0
644	-0.001	0	0	-0.001	-0.001	-0.001	-0.001	0
644.5	-0.001	0	0	-0.001	-0.001	-0.001	-0.001	0
645	-0.001	0	-0.001	-0.001	-0.001	-0.001	-0.001	0
645.5	-0.001	0	0	-0.001	-0.001	-0.001	-0.001	0
646	-0.001	0	0	-0.001	-0.001	-0.001	-0.001	0
646.5	-0.001	0	0	-0.001	-0.001	-0.001	-0.001	0
647	-0.001	0	0	-0.001	-0.001	-0.001	-0.001	0
647.5	-0.001	0	0	-0.001	-0.001	-0.001	-0.001	0
648	-0.001	0	-0.001	-0.001	-0.001	-0.001	-0.001	0
648.5	-0.001	0	-0.001	-0.001	-0.001	-0.001	-0.001	0
649	-0.001	0	-0.001	-0.001	-0.001	-0.001	-0.001	0
649.5	-0.001	0	-0.001	-0.001	-0.001	-0.001	-0.001	0
650	-0.001	0	-0.001	-0.001	-0.001	-0.001	-0.001	0
650.5	-0.001	0	-0.001	-0.001	-0.001	-0.001	-0.001	0
651	-0.001	0	-0.001	-0.001	-0.001	-0.001	-0.001	0
651.5	-0.001	0	-0.001	-0.001	-0.001	-0.001	-0.001	0
652	-0.001	0	-0.001	-0.001	-0.001	-0.001	-0.001	0
652.5	-0.001	0	-0.001	-0.001	-0.001	-0.001	-0.001	0
653	-0.001	0	-0.001	-0.001	-0.001	-0.001	-0.001	0
653.5	-0.001	0	-0.001	-0.001	-0.001	-0.001	-0.001	0
654	-0.001	0	-0.001	-0.001	-0.001	-0.001	-0.001	0
654.5	-0.001	0	-0.001	-0.001	-0.001	-0.001	-0.001	0
655	-0.001	0	-0.001	-0.001	-0.001	-0.001	-0.001	0
655.5	-0.001	0	-0.001	-0.001	-0.001	-0.001	-0.001	0
656	-0.001	0	-0.001	-0.001	-0.001	-0.001	-0.001	0
656.5	-0.001	0	-0.001	-0.001	-0.001	-0.001	-0.001	0
657	-0.001	0	-0.001	-0.001	-0.001	-0.001	-0.001	0
657.5	-0.001	0	-0.001	-0.001	-0.001	-0.001	-0.001	0
658	-0.001	0	-0.001	-0.001	-0.001	-0.001	-0.001	0
658.5	-0.001	0	-0.001	-0.001	-0.001	-0.001	-0.001	0
659	-0.001	0	-0.001	-0.001	-0.001	-0.001	-0.001	0
659.5	-0.001	0	-0.001	-0.001	-0.001	-0.001	-0.001	0
660	-0.001	0	-0.001	-0.001	-0.001	-0.001	-0.001	0
660.5	-0.001	-0.001	-0.001	-0.001	-0.001	-0.001	-0.001	0
661	-0.001	0	-0.001	-0.001	-0.001	-0.001	-0.001	0
661.5	-0.001	0	-0.001	-0.001	-0.001	-0.001	-0.001	0
662	-0.001	0	-0.001	-0.001	-0.001	-0.001	-0.001	0
662.5	-0.001	0	-0.001	-0.001	-0.001	-0.001	-0.001	0
663	-0.001	0	-0.001	-0.001	-0.001	-0.001	-0.001	0
663.5	-0.001	-0.001	-0.001	-0.001	-0.001	-0.001	-0.001	0
664	-0.001	-0.001	-0.001	-0.001	-0.001	-0.001	-0.001	0
664.5	-0.001	-0.001	-0.001	-0.001	-0.001	-0.001	-0.001	0
665	-0.001	-0.001	-0.001	-0.001	-0.001	-0.001	-0.001	0
665.5	-0.001	-0.001	-0.001	-0.001	-0.001	-0.001	-0.001	0
666	-0.001	-0.001	-0.001	-0.001	-0.001	-0.001	-0.001	0
666.5	-0.001	-0.001	-0.001	-0.001	-0.001	-0.001	-0.001	0
667	-0.001	-0.001	-0.001	-0.001	-0.001	-0.001	-0.001	0
667.5	-0.001	-0.001	-0.001	-0.001	-0.001	-0.001	-0.001	0
668	-0.001	-0.001	-0.001	-0.001	-0.001	-0.001	-0.001	0
668.5	-0.001	-0.001	-0.001	-0.001	-0.001	-0.001	-0.001	0
669	-0.001	-0.001	-0.001	-0.001	-0.001	-0.001	-0.001	0
669.5	-0.001	-0.001	-0.001	-0.001	-0.001	-0.001	-0.001	0
670	-0.001	-0.001	-0.001	-0.001	-0.001	-0.001	-0.001	0
670.5	-0.001	-0.001	-0.001	-0.001	-0.001	-0.001	-0.001	0
671	-0.001	-0.001	-0.001	-0.001	-0.001	-0.001	-0.001	0
671.5	-0.001	-0.001	-0.001	-0.001	-0.001	-0.001	-0.001	0
672	-0.001	-0.001	-0.001	-0.001	-0.001	-0.001	-0.001	0
672.5	-0.001	-0.001	-0.001	-0.001	-0.001	-0.001	-0.001	0
673	-0.001	-0.001	-0.001	-0.001	-0.001	-0.001	-0.001	0
673.5	-0.001	-0.001	-0.001	-0.001	-0.001	-0.001	-0.001	0
674	-0.001	-0.001	-0.001	-0.001	-0.001	-0.001	-0.001	0
674.5	-0.001	-0.001	-0.001	-0.001	-0.001	-0.001	-0.001	0
675	-0.001	-0.001	-0.001	-0.001	-0.001	-0.001	-0.001	0
675.5	-0.001	-0.001	-0.001	-0.001	-0.001	-0.001	-0.001	0
676	-0.001	-0.001	-0.001	-0.001	-0.001	-0.001	-0.001	0
676.5	-0.001	-0.001	-0.001	-0.001	-0.001	-0.001	-0.001	0
677	-0.001	-0.001	-0.001	-0.001	-0.001	-0.001	-0.001	0
677.5	-0.001	-0.001	-0.001	-0.001	-0.001	-0.001	-0.001	0
678	-0.001	-0.001	-0.001	-0.001	-0.001	-0.001	-0.001	0
678.5	-0.001	-0.001	-0.001	-0.001	-0.001	-0.001	-0.001	0
679	-0.001	-0.001	-0.001	-0.001	-0.001	-0.001	-0.001	0
679.5	-0.001	-0.001	-0.001	-0.001	-0.001	-0.001	-0.001	0
680	-0.001	-0.001	-0.001	-0.001	-0.001	-0.001	-0.001	0
680.5	-0.001	-0.001	-0.001	-0.001	-0.001	-0.001	-0.001	0
681	-0.001	-0.001	-0.001	-0.001	-0.001	-0.001	-0.001	0
681.5	-0.001	-0.001	-0.001	-0.001	-0.001	-0.001	-0.001	0
682	-0.001	-0.001	-0.001	-0.001	-0.001	-0.001	-0.001	0
682.5	-0.001	-0.001	-0.001	-0.001	-0.001	-0.001	-0.001	0
683	-0.001	-0.001	-0.001	-0.001	-0.001	-0.001	-0.001	0
683.5	-0.001	-0.001	-0.001	-0.001	-0.001	-0.001	-0.001	0
684	-0.001	-0.001	-0.001	-0.001	-0.001	-0.001	-0.001	0
684.5	-0.001	-0.001	-0.001	-0.001	-0.001	-0.001	-0.001	0
685	-0.001	-0.001	-0.001	-0.001	-0.001	-0.001	-0.001	0
685.5	-0.001	-0.001	-0.001	-0.001	-0.001	-0.001	-0.001	0
686	-0.001	-0.001	-0.001	-0.001	-0.001	-0.001	-0.001	0
686.5	-0.001	-0.001	-0.001	-0.001	-0.001	-0.001	-0.001	0
687	-0.001	-0.001	-0.001	-0.001	-0.001	-0.001	-0.001	0
687.5	-0.001	-0.001	-0.001	-0.001	-0.001	-0.001	-0.001	0
688	-0.001	-0.001	-0.001	-0.001	-0.001	-0.001	-0.001	0
688.5	-0.001	-0.001	-0.001	-0.001	-0.001	-0.001	-0.001	0
689	-0.001	-0.001	-0.001	-0.001	-0.001	-0.001	-0.001	0
689.5	-0.001	-0.001	-0.001	-0.001	-0.001	-0.001	-0.001	0
690	-0.001	-0.001	-0.001	-0.001	-0.001	-0.001	-0.001	0
690.5	-0.001	-0.001	-0.001	-0.001	-0.001	-0.001	-0.001	0
691	-0.001	-0.001	-0.001	-0.001	-0.001	-0.001	-0.001	0
691.5	-0.001	-0.001	-0.001	-0.001	-0.001	-0.001	-0.001	0
692	-0.001	-0.001	-0.001	-0.001	-0.001	-0.001	-0.001	0
692.5	-0.001	-0.001	-0.001	-0.001	-0.001	-0.001	-0.001	0
693	-0.001	-0.001	-0.001	-0.001	-0.001	-0.001	-0.001	0
693.5	-0.001	-0.001	-0.001	-0.001	-0.001	-0.001	-0.001	0
694	-0.001	-0.001	-0.001	-0.001	-0.001	-0.001	-0.001	0
694.5	-0.001	-0.001	-0.001	-0.001	-0.001	-0.001	-0.001	0
695	-0.001	-0.001	-0.001	-0.001	-0.001	-0.001	-0.001	0
695.5	-0.001	-0.001	-0.001	-0.001	-0.001	-0.001	-0.001	0
696	-0.001	-0.001	-0.001	-0.001	-0.001	-0.001	-0.001	0
696.5	-0.001	-0.001	-0.001	-0.001	-0.001	-0.001	-0.001	0
697	-0.001	-0.001	-0.001	-0.001	-0.001	-0.001	-0.001	0
697.5	-0.001	-0.001	-0.001	-0.001	-0.001	-0.001	-0.001	0
698	-0.001	-0.001	-0.001	-0.001	-0.001	-0.001	-0.001	0
698.5	-0.001	-0.001	-0.001	-0.001	-0.001	-0.001	-0.001	0
699	-0.001	-0.001	-0.001	-0.001	-0.001	-0.001	-0.001	0
699.5	-0.001	-0.001	-0.001	-0.001	-0.001	-0.001	-0.001	0
700	-0.001	-0.001	-0.001	-0.001	-0.001	-0.001	-0.001	0
700.5	-0.001	-0.001	-0.001	-0.001	-0.001	-0.001	-0.001	0
701	-0.001	-0.001	-0.001	-0.001	-0.001	-0.001	-0.001	0
701.5	-0.001	-0.001	-0.001	-0.001	-0.001	-0.001	-0.001	0
702	-0.001	-0.001	-0.001	-0.001	-0.001	-0.001	-0.001	0
702.5	-0.001	-0.001	-0.001	-0.001	-0.001	-0.001	-0.001	0
703	-0.001	-0.001	-0.001	-0.001	-0.001	-0.001	-0.001	0
703.5	-0.001	-0.001	-0.001	-0.001	-0.001	-0.001	-0.001	0
704	-0.001	-0.001	-0.001	-0.001	-0.001	-0.001	-0.001	0
704.5	-0.001	-0.001	-0.001	-0.001	-0.001	-0.001	-0.001	0
705	-0.001	-0.001	-0.001	-0.001	-0.001	-0.001	-0.001	0
705.5	-0.001	-0.001	-0.001	-0.001	-0.001	-0.001	-0.001	0
706	-0.001	-0.001	-0.001	-0.001	-0.001	-0.001	-0.001	0
706.5	-0.001	-0.001	-0.001	-0.001	-0.001	-0.001	-0.001	0
707	-0.001	-0.001	-0.001	-0.001	-0.001	-0.001	-0.001	0
707.5	-0.001	-0.001	-0.001	-0.001	-0.001	-0.001	-0.001	0
708	-0.001	-0.001	-0.001	-0.001	-0.001	-0.001	-0.001	0
708.5	-0.001	-0.001	-0.001	-0.001	-0.001	-0.001	-0.001	0
709	-0.001	-0.001	-0.001	-0.001	-0.001	-0.001	-0.001	0
709.5	-0.001	-0.001	-0.001	-0.001	-0.001	-0.001	-0.001	0
710	-0.001	-0.001	-0.001	-0.001	-0.001	-0.001	-0.001	0
710.5	-0.001	-0.001	-0.001	-0.001	-0.001	-0.001	-0.001	0
711	-0.001	-0.001	-0.001	-0.001	-0.001	-0.001	-0.001	0
711.5	-0.001	-0.001	-0.001	-0.001	-0.001	-0.001	-0.001	0
712	-0.001	-0.001	-0.001	-0.001	-0.001	-0.001	-0.001	0
712.5	-0.001	-0.001	-0.001	-0.001	-0.001	-0.001	-0.001	0
713	-0.001	-0.001	-0.001	-0.001	-0.001	-0.001	-0.001	0
713.5	-0.001	-0.001	-0.001	-0.001	-0.001	-0.001	-0.001	0
714	-0.001	-0.001	-0.001	-0.001	-0.001	-0.001	-0.001	0
714.5	-0.001	-0.001	-0.001	-0.001	-0.001	-0.001	-0.001	0
715	-0.001	-0.001	-0.001	-0.001	-0.001	-0.001	-0.001	0
715.5	-0.001	-0.001	-0.001	-0.001	-0.001	-0.001	-0.001	0
716	-0.001	-0.001	-0.001	-0.001	-0.001	-0.001	-0.001	0
716.5	-0.001	-0.001	-0.001	-0.001	-0.001	-0.001	-0.001	0
717	-0.001	-0.001	-0.001	-0.001	-0.001	-0.001	-0.001	0
717.5	-0.001	-0.001	-0.001	-0.001	-0.001	-0.001	-0.001	0
718	-0.001	-0.001	-0.001	-0.001	-0.001	-0.001	-0.001	0
718.5	-0.001	-0.001	-0.001	-0.001	-0.001	-0.001	-0.001	0
719	-0.001	-0.001	-0.001	-0.001	-0.001	-0.001	-0.001	0
719.5	-0.001	-0.001	-0.001	-0.001	-0.001	-0.001	-0.001	0
720	-0.001	-0.001	-0.001	-0.001	-0.001	-0.001	-0.001	0
720.5	-0.001	-0.001	-0.001	-0.001	-0.001	-0.001	-0.001	0
721	-0.001	-0.001	-0.001	-0.001	-0.001	-0.001	-0.001	0
721.5	-0.001	-0.001	-0.001	-0.001	-0.001	-0.001	-0.001	0
722	-0.001	-0.001	-0.001	-0.001	-0.001	-0.001	-0.001	0
722.5	-0.001	-0.001	-0.001	-0.001	-0.001	-0.001	-0.001	0
723	-0.001	-0.001	-0.001	-0.001	-0.001	-0.001	-0.001	0
723.5	-0.001	-0.001	-0.001	-0.001	-0.001	-0.001	-0.001	0
724	-0.001	-0.001	-0.001	-0.001	-0.001	-0.001	-0.001	0
724.5	-0.001	-0.001	-0.001	-0.001	-0.001	-0.001	-0.001	0
725	-0.001	-0.001	-0.001	-0.001	-0.001	-0.001	-0.001	0
725.5	-0.001	-0.001	-0.001	-0.001	-0.001	-0.001	-0.001	0
726	-0.001	-0.001	-0.001	-0.001	-0.001	-0.001	-0.001	0
726.5	-0.001	-0.001	-0.001	-0.001	-0.001	-0.001	-0.001	0
727	-0.001	-0.001	-0.001	-0.001	-0.001	-0.001	-0.001	0
727.5	-0.001	-0.001	-0.001	-0.001	-0.001	-0.001	-0.001	0
728	-0.001	-0.001	-0.001	-0.001	-0.001	-0.001	-0.001	0
728.5	-0.001	-0.001	-0.001	-0.001	-0.001	-0.001	-0.001	0
729	-0.001	-0.001	-0.001	-0.001	-0.001	-0.001	-0.001	0
729.5	-0.001	-0.001	-0.001	-0.001	-0.001	-0.001	-0.001	0
730	-0.001	-0.001	-0.001	-0.001	-0.001	-0.001	-0.001	0
730.5	-0.001	-0.001	-0.001	-0.001	-0.001	-0.001	-0.001	0
731	-0.001	-0.001	-0.001	-0.001	-0.001	-0.001	-0.001	0
731.5	-0.001	-0.001	-0.001	-0.001	-0.001	-0.001	-0.001	0
732	-0.001	-0.001	-0.001	-0.001	-0.001	-0.001	-0.001	0
732.5	-0.001	-0.001	-0.001	-0.001	-0.001	-0.001	-0.001	0
733	-0.001	-0.001	-0.001	-0.001	-0.001	-0.001	-0.001	0
733.5	-0.001	-0.001	-0.001	-0.001	-0.001	-0.001	-0.001	0
734	-0.001	-0.001	-0.001	-0.001	-0.001	-0.001	-0.001	0
734.5	-0.001	-0.001	-0.001	-0.001	-0.001	-0.001	-0.001	0
735	-0.001	-0.001	-0.001	-0.001	-0.001	-0.001	-0.001	0
735.5	-0.001	-0.001	-0.001	-0.001	-0.001	-0.001	-0.001	0
736	-0.001	-0.001	-0.001	-0.001	-0.001	-0.001	-0.001	0
736.5	-0.001	-0.001	-0.001	-0.001	-0.001	-0.001	-0.001	0
737	-0.001	-0.001	-0.001	-0.001	-0.001	-0.001	-0.001	0
737.5	-0.001	-0.001	-0.001	-0.001	-0.001	-0.001	-0.001	0
738	-0.001	-0.001	-0.001	-0.001	-0.001	-0.001	-0.001	0
738.5	-0.001	-0.001	-0.001	-0.001	-0.001	-0.001	-0.001	0
739	-0.001	-0.001	-0.001	-0.001	-0.001	-0.001	-0.001	0
739.5	-0.001	-0.001	-0.001	-0.001	-0.001	-0.001	-0.001	0
740	-0.001	-0.001	-0.001	-0.001	-0.001	-0.001	-0.001	0
740.5	-0.001	-0.001	-0.001	-0.001	-0.001	-0.001	-0.001	0
741	-0.001	-0.001	-0.001	-0.001	-0.001	-0.001	-0.001	0
741.5	-0.001	-0.001	-0.001	-0.001	-0.001	-0.001	-0.001	0
742	-0.001	-0.001	-0.001	-0.001	-0.001	-0.001	-0.001	0
742.5	-0.001	-0.001	-0.001	-0.001	-0.001	-0.001	-0.001	0
743	-0.001	-0.001	-0.001	-0.001	-0.001	-0.001	-0.001	0
743.5	-0.001	-0.001	-0.001	-0.001	-0.001	-0.001	-0.001	0
744	-0.001	-0.001	-0.001	-0.001	-0.001	-0.001	-0.001	0
744.5	-0.001	-0.001	-0.001	-0.001	-0.001	-0.001	-0.001	0
745	-0.001	-0.001	-0.001	-0.001	-0.001	-0.001	-0.001	0
745.5	-0.001	-0.001	-0.001	-0.001	-0.001	-0.001	-0.001	0
746	-0.001	-0.001	-0.001	-0.001	-0.001	-0.001	-0.001	0
746.5	-0.001	-0.001	-0.001	-0.001	-0.001	-0.001	-0.001	0
747	-0.001	-0.001	-0.001	-0.001	-0.001	-0.001	-0.001	0
747.5	-0.001	-0.001	-0.001	-0.001	-0.001	-0.001	-0.001	0
748	-0.001	-0.001	-0.001	-0.001	-0.001	-0.001	-0.001	0
748.5	-0.001	-0.001	-0.001	-0.001	-0.001	-0.001	-0.001	0
749	-0.001	-0.001	-0.001	-0.001	-0.001	-0.001	-0.001	0
749.5	-0.001	-0.001	-0.001	-0.001	-0.001	-0.001	-0.001	0
750	-0.001	-0.001	-0.001	-0.001	-0.001	-0.001	-0.001	0
750.5	-0.001	-0.001	-0.001	-0.001	-0.001	-0.001	-0.001	0
751	-0.001	-0.001	-0.001	-0.001	-0.001	-0.001	-0.001	0
751.5	-0.001	-0.001	-0.001	-0.001	-0.001	-0.001	-0.001	0
752	-0.001	-0.001	-0.001	-0.001	-0.001	-0.001	-0.001	0
752.5	-0.001	-0.001	-0.001	-0.001	-0.001	-0.001	-0.001	0
753	-0.001	-0.001	-0.001	-0.001	-0.001	-0.001	-0.001	0
753.5	-0.001	-0.001	-0.001	-0.001	-0.001	-0.001	-0.001	0
754	-0.001	-0.001	-0.001	-0.001	-0.001	-0.001	-0.001	0
754.5	-0.001	-0.001	-0.001	-0.001	-0.001	-0.001	-0.001	0
755	-0.001	-0.001	-0.001	-0.001	-0.001	-0.001	-0.001	0
755.5	-0.001	-0.001	-0.001	-0.001	-0.001	-0.001	-0.001	0
756	-0.001	-0.001	-0.001	-0.001	-0.001	-0.001	-0.001	0
756.5	-0.001	-0.001	-0.001	-0.001	-0.001	-0.001	-0.001	0
757	-0.001	-0.001	-0.001	-0.001	-0.001	-0.001	-0.001	0
757.5	-0.001	-0.001	-0.001	-0.001	-0.001	-0.001	-0.001	0
758	-0.001	-0.001	-0.001	-0.001	-0.001	-0.001	-0.001	0
758.5	-0.001	-0.001	-0.001	-0.001	-0.001	-0.001	-0.001	0
759	-0.001	-0.001	-0.001	-0.001	-0.001	-0.001	-0.001	0
759.5	-0.001	-0.001	-0.001	-0.001	-0.001	-0.001	-0.001	0
760	-0.001	-0.001	-0.001	-0.001	-0.001	-0.001	-0.001	0
760.5	-0.001	-0.001	-0.001	-0.001	-0.001	-0.001	-0.001	0
761	-0.001	-0.001	-0.001	-0.001	-0.001	-0.001	-0.001	0
761.5	-0.001	-0.001	-0.001	-0.001	-0.001	-0.001	-0.001	0
762	-0.001	-0.001	-0.001	-0.001	-0.001	-0.001	-0.001	0
762.5	-0.001	-0.001	-0.001	-0.001	-0.001	-0.001	-0.001	0
763	-0.001	-0.001	-0.001	-0.001	-0.001	-0.001	-0.001	0
763.5	-0.001	-0.001	-0.001	-0.001	-0.001	-0.001	-0.001	0
764	-0.001	-0.001	-0.001	-0.001	-0.001	-0.001	-0.001	0
764.5	-0.001	-0.001	-0.001	-0.001	-0.001	-0.001	-0.001	0
765	-0.001	-0.001	-0.001	-0.001	-0.001	-0.001	-0.001	0
765.5	-0.001	-0.001	-0.001	-0.001	-0.001	-0.001	-0.001	0
766	-0.001	-0.001	-0.001	-0.001	-0.001	-0.001	-0.001	0
766.5	-0.001	-0.001	-0.001	-0.001	-0.001	-0.001	-0.001	0
767	-0.001	-0.001	-0.001	-0.001	-0.001	-0.001	-0.001	0
767.5	-0.001	-0.001	-0.001	-0.001	-0.001	-0.001	-0.001	0
768	-0.001	-0.001	-0.001	-0.001	-0.001	-0.001	-0.001	0
768.5	-0.001	-0.001	-0.001	-0.001	-0.001	-0.001	-0.001	0
769	-0.001	-0.001	-0.001	-0.001	-0.001	-0.001	-0.001	0
769.5	-0.001	-0.001	-0.001	-0.001	-0.001	-0.001	-0.001	0
770	-0.001	-0.001	-0.001	-0.001	-0.001	-0.001	-0.001	0
770.5	-0.001	-0.001	-0.001	-0.001	-0.001	-0.001	-0.001	0
771	-0.001	-0.001	-0.001	-0.001	-0.001	-0.001	-0.001	0
771.5	-0.001	-0.001	-0.001	-0.001	-0.001	-0.001	-0.001	0
772	-0.001	-0.001	-0.001	-0.001	-0.001	-0.001	-0.001	0
772.5	-0.001	-0.001	-0.001	-0.001	-0.001	-0.001	-0.001	0
773	-0.001	-0.001	-0.001	-0.001	-0.001	-0.001	-0.001	0
773.5	-0.001	-0.001	-0.001	-0.001	-0.001	-0.001	-0.001	0
774	-0.001	-0.001	-0.001	-0.001	-0.001	-0.001	-0.001	0
774.5	-0.001	-0.001	-0.001	-0.001	-0.001	-0.001	-0.001	0
775	-0.001	-0.001	-0.001	-0.001	-0.001	-0.001	-0.001	0
775.5	-0.001	-0.001	-0.001	-0.001	-0.001	-0.001	-0.001	0
776	-0.001	-0.001	-0.001	-0.001	-0.001	-0.001	-0.001	0
776.5	-0.001	-0.001	-0.001	-0.001	-0.001	-0.001	-0.001	0
777	-0.001	-0.001	-0.001	-0.001	-0.001	-0.001	-0.001	0
777.5	-0.001	-0.001	-0.001	-0.001	-0.001	-0.001	-0.001	0
778	-0.001	-0.001	-0.001	-0.001	-0.001	-0.001	-0.001	0
778.5	-0.001	-0.001	-0.001	-0.001	-0.001	-0.001	-0.001	0
779	-0.001	-0.001	-0.001	-0.001	-0.001	-0.001	-0.001	0
779.5	-0.001	-0.001	-0.001	-0.001	-0.001	-0.001	-0.001	0
780	-0.001	-0.001	-0.001	-0.001	-0.001	-0.001	-0.001	0
780.5	-0.001	-0.001	-0.001	-0.001	-0.001	-0.001	-0.001	0
781	-0.001	-0.001	-0.001	-0.001	-0.001	-0.001	-0.001	0
781.5	-0.001	-0.001	-0.001	-0.001	-0.001	-0.001	-0.001	0
782	-0.001	-0.001	-0.001	-0.001	-0.001	-0.001	-0.001	0
782.5	-0.001	-0.001	-0.001	-0.001	-0.001	-0.001	-0.001	0
783	-0.001	-0.001	-0.001	-0.001	-0.001	-0.001	-0.001	0
783.5	-0.001	-0.001	-0.001	-0.001	-0.001	-0.001	-0.001	0
784	-0.001	-0.001	-0.001	-0.001	-0.001	-0.001	-0.001	0
784.5	-0.001	-0.001	-0.001	-0.001	-0.001	-0.001	-0.001	0
785	-0.001	-0.001	-0.001	-0.001	-0.001	-0.001	-0.001	0
785.5	-0.001	-0.001	-0.001	-0.001	-0.001	-0.001	-0.001	0
786	-0.001	-0.001	-0.001	-0.001	-0.001	-0.001	-0.001	0
786.5	-0.001	-0.001	-0.001	-0.001	-0.001	-0.001	-0.001	0
787	-0.001	-0.001	-0.001	-0.001	-0.001	-0.001	-0.001	0
787.5	-0.001	-0.001	-0.001	-0.001	-0.001	-0.001	-0.001	0
788	-0.001	-0.001	-0.001	-0.001	-0.001	-0.001	-0.001	0
788.5	-0.001	-0.001	-0.001	-0.001	-0.001	-0.001	-0.001	0
789	-0.001	-0.001	-0.001	-0.001	-0.001	-0.001	-0.001	0
789.5	-0.001	-0.001	-0.001	-0.001	-0.001	-0.001	-0.001	0
790	-0.001	-0.001	-0.001	-0.001	-0.001	-0.001	-0.001	0
790.5	-0.001	-0.001	-0.001	-0.001	-0.001	-0.001	-0.001	0
791	-0.001	-0.001	-0.001	-0.001	-0.001	-0.001	-0.001	0
791.5	-0.001	-0.001	-0.001	-0.001	-0.001	-0.001	-0.001	0
792	-0.001	-0.001	-0.001	-0.001	-0.001	-0.001	-0.001	0
792.5	-0.001	-0.001	-0.001	-0.001	-0.001	-0.001	-0.001	0
793	-0.001	-0.001	-0.001	-0.001	-0.001	-0.001	-0.001	0
793.5	-0.001	-0.001	-0.001	-0.001	-0.001	-0.001	-0.001	0
794	-0.001	-0.001	-0.001	-0.001	-0.001	-0.001	-0.001	0
794.5	-0.001	-0.001	-0.001	-0.001	-0.001	-0.001	-0.001	0
795	-0.001	-0.001	-0.001	-0.001	-0.001	-0.001	-0.001	0
795.5	-0.001	-0.001	-0.001	-0.001	-0.001	-0.001	-0.001	0
796	-0.001	-0.001	-0.001	-0.001	-0.001	-0.001	-0.001	0
796.5	-0.001	-0.001	-0.001	-0.001	-0.001	-0.001	-0.001	0
797	-0.001	-0.001	-0.001	-0.001	-0.001	-0.001	-0.001	0
797.5	-0.001	-0.001	-0.001	-0.001	-0.001	-0.001	-0.001	0
798	-0.001	-0.001	-0.001	-0.001	-0.001	-0.001	-0.001	0
798.5	-0.001	-0.001	-0.001	-0.001	-0.001	-0.001	-0.001	0
799	-0.001	-0.001	-0.001	-0.001	-0.001	-0.001	-0.001	0
799.5	-0.001	-0.001	-0.001	-0.001	-0.001	-0.001	-0.001	0
800	-0.001	-0.001	-0.001	-0.001	-0.001	-0.001	-0.001	0

## Sheet: Mineralization kinetics 
0	1	0	1	1	1	0	0	0
20	0.94919	0.01017	0.942	0.95638	0.94919	0.01017	508117	0.05215
40	0.8696	0.03889	0.8971	0.8421	0.8696	0.03889	1304001	0.13972
60	0.78346	0.03824	0.8105	0.75642	0.78346	0.03824	2165409	0.24404
80	0.64615	0.07503	0.6992	0.59309	0.64615	0.07503	3538544	0.43673
100	0.53803	0.07858	0.5936	0.48247	0.53803	0.07858	4619664	0.61983
120	0.47698	0.06663	0.5241	0.42987	0.47698	0.06663	5230157	0.74027
140	0.42265	0.04971	0.4578	0.3875	0.42265	0.04971	5773513	0.86121
