# Supplementary material for: Synthesis of nano-TiO 2 assisted by glycols and submitted to hydrothermal or conventional heat treatment with promising photocatalytic activity
Source: PeerJ journal article supplement (doi:10.7717/peerj-matsci.13), 2021-03-24
Supplement: Supplementary_Files_1_-_Table_S1.docx [file Supplementary_Files_1_-_Table_S1.docx]

| **Photocatalyst** | **χ2** | **S*** | **RBragg/%a** | **Crystallite size (nm)** | **Phase composition (%)** |
| --- | --- | --- | --- | --- | --- |
| TiO2G1HT | 1.98 | 1.40 | 1.58 (A)  3.58 (B) | 6 ± 1 | 81.40(A)  18.60(B) |
| TiO2G2HT | 2.17 | 1.47 | 2.51 (A)  3.55 (B) | 6 ± 1 | 80.08(A)  19.92(B) |
| TiO2G3HT | 2.01 | 1.42 | 1.89 (A)  4.17 (B) | 6 ± 2 | 79.49(A)  20.51(B) |
| TiO2G1M | 1.84 | 1.36 | 1.21 | 18 ± 2 | 100.00 (A) |
| TiO2G2M | 1.96 | 1.40 | 2.36 | 13 ± 2 | 100.00 (A) |
| TiO2G3M | 1.78 | 1.33 | 1.16 (A)  2.22 (B) | 11 ± 2 | 82.53(A) 17.47(B) |

* Factor S - Goodness of Fit;

a RBragg - Bragg Factor.

Where: (A) is anatase and (B) is brookite.
